# Supplementary material for: Psychological stress disturbs bone metabolism via miR-335-3p/Fos signaling in osteoclast
Source: eLife. 2025 Jan 8;13:RP95944. doi: 10.7554/eLife.95944 (PMC11709429; doi:10.7554/eLife.95944)
Supplement: Figure 1—source data 1. [file elife-95944-fig1-data1.xlsx]

## Sheet: Fig.1B
week	CON									CUMS
0	23.7	22.5	24.4	23.5	22.8	24.6	25.1	24.4	24.7	22	23.3	22.2	24.8	23.7	24.1	24.1	19.8	25.7
1	25.8	24.8	27	25.3	23.9	27.6	28	26.6	26.3	23.8	24.9	23.6	26	24.8	26.5	26.5	21.8	28.1
2	25.8	25.6	28.4	26.8	24.3	28.1	29.7	27.9	27.6	21.5	22.6	24.8	23.6	22.3	22.8	22.5	19.6	25.2
3	26.2	26.7	29.1	28.3	25.3	29.1	31.4	29.1	28.6	22.1	22.6	21.4	24.5	22.5	24.7	24	20.4	25.9
4	26.9	26.9	29.9	29.6	25.5	29.8	32	28.4	30.3	24.6	25.3	23.8	25.6	24.4	26.5	26.4	21.7	28.6
5	27.5	27.7	29.5	29.9	26.6	29.8	33.4	29.4	31.7	24	24.8	23.4	26	25.1	26.2	26.3	23.1	29.7

## Sheet: Fig.1D-1
CON	CUMS
1898.1	951.38
1108.58	321.43
1196.35	839.17
1575.3	922.47
1020.03	897.41
1171.58	1305.67
1093.98	1181.03
2459.24	1015.68
1409.88	1144.63

## Sheet: Fig.1D-2
CON	CUMS
154.73	143.37
129.6	46.9
140.63	134.57
155.1	66.17
165.33	90.6
136.9	123.4
100.43	130.2
186.67	94.27
129.63	138.13

## Sheet: Fig.1E
CON	CUMS
5724.19	5814.48
5381.72	4838.44
6620.57	6317.28
6466.65	5593.42
6155.73	5961.97
6083.86	5550.19
6371.55	4817.71
4192.8	5810.14
5156.38	6474.55

## Sheet: Fig.1F
CON	CUMS
138.8	124.63
131.57	111.13
100.93	206.5
132.67	160.4
79	88.2
124.93	149.6
84.13	199.43
147.33	132.93
14.53	179

## Sheet: Fig.1G
CON	CUMS
0.75	0.75
0.9333	0.7778
1	0.7857
0.9	0.8667
0.9412	0.6429
0.8667	0.8182
0.8333	0.5455
0.8889	0.75
0.8333	0.6667

## Sheet: Fig.1I
CON	CUMS
6.81138	6.13859
6.70643	7.70484
5.03182	7.67138
5.11238	7.19826
5.30837	8.08152

## Sheet: Fig.1H
CON	CUMS
117.283	156.677
101.13	149.79
93.9737	137.159
120.58	170.496
69.8572	169.778
69.745	175.207
