# Supplementary material for: Psychological stress disturbs bone metabolism via miR-335-3p/Fos signaling in osteoclast
Source: eLife. 2025 Jan 8;13:RP95944. doi: 10.7554/eLife.95944 (PMC11709429; doi:10.7554/eLife.95944)
Supplement: Figure 2—source data 1. [file elife-95944-fig2-data1.xlsx]

## Sheet: Fig.2B-1
CON	CUMS
0.0544	0.0293
0.0731	0.0376
0.083	0.0173
0.0653	0.0346
0.0448	0.0304
0.0502	0.0175
0.0669	0.029

## Sheet: Fig.2B-2
CON	CUMS
0.0741	0.0458
0.0947	0.0458
0.1176	0.0356
0.0879	0.0196
0.0633	0.0418
0.0929	0.0218
0.0532	0.0362

## Sheet: Fig.2B-3
CON	CUMS
1.7493	1.0908
2.1648	1.0908
2.2428	0.9482
1.7598	0.4874
1.5275	1.0008
1.8831	0.5706
1.9384	0.837

## Sheet: Fig.2B-4
CON	CUMS
0.5406	0.8817
0.4282	0.8817
0.4089	1.0237
0.5312	2.0161
0.6254	0.9688
0.5044	1.7218
0.4814	1.1601

## Sheet: Fig.2C-1
CON	CUMS
1159.56	1150.09
1153.28	1091.2
1147.93	1129.84
1156.19	1138.93
1149.72	1121.96
1149.72	1144.65
1151.59	1137.53

## Sheet: Fig.2C-2
CON	CUMS
0.8918	0.8651
0.8908	0.8263
0.8767	0.8681
0.8994	0.8706
0.8893	0.8726
0.8893	0.8759
0.8927	0.8558

## Sheet: Fig.2C-3
CON	CUMS
0.8264	0.6293
0.9591	0.5397
0.8755	0.6068
0.8376	0.5892
0.7772	0.6749
0.8376	0.658
0.7611	0.6753

## Sheet: Fig.2C-4
CON	CUMS
0.0311	0.031
0.0338	0.0308
0.037	0.0314
0.0371	0.0303
0.0324	0.0308
0.0345	0.0346
0.0317	0.0321
