# Supplementary material for: Psychological stress disturbs bone metabolism via miR-335-3p/Fos signaling in osteoclast
Source: eLife. 2025 Jan 8;13:RP95944. doi: 10.7554/eLife.95944 (PMC11709429; doi:10.7554/eLife.95944)
Supplement: Figure 3—figure supplement 1—source data 1. [file elife-95944-fig3-figsupp1-data1.xlsx]

## Sheet: Sheet2
	CON	CUMS
calcium	2.22833	2.39333
	2.165	2.48833
	2.13167	2.33333
	2.30667	2.26667
phosphate	5.73167	8.24667
	6.85	8.82333
	7.23	9.635
	7.72667	8.395
ctsk	2066.84	2003.11
	2544.97	1563.47
	2315.91	2888.25
	1969.25	1718.95
Trap	8.406	10.702
	10.816	11.967
	9.185	11.783
	7.289	12.411
BGP	43.196	64.396
	53.826	63.697
	62.841	65.261
	44.733	64.868
PTH	951.837	859.895
	1440.96	535.527
	846.656	585.727
	1270.87	808.408
