# Supplementary material for: Psychological stress disturbs bone metabolism via miR-335-3p/Fos signaling in osteoclast
Source: eLife. 2025 Jan 8;13:RP95944. doi: 10.7554/eLife.95944 (PMC11709429; doi:10.7554/eLife.95944)
Supplement: Figure 3—figure supplement 2—source data 1. [file elife-95944-fig3-figsupp2-data1.xlsx]

## Sheet: Sheet1
Groups	AVERAGE(GAPDH)	AVERAGE(Target gene)	GENE
CUMS	21.7867	29.2133	rankl
CUMS	22.54	29.26	rankl
CUMS	22.4133	29.4667	rankl
control	22.17	29.2967	rankl
control	23.5133	30.6533	rankl
control	21.6133	29.7933	rankl
CUMS	21.6433	29.22	oscar
CUMS	22.56	29.99	oscar
CUMS	22.5567	30.72	oscar
control	21.6233	29.3467	oscar
control	21.6233	29.5367	oscar
control	21.6233	29.7267	oscar
CUMS	21.7867	32.9067	opg
CUMS	22.54	33.2567	opg
CUMS	22.4133	32.93	opg
control	22.17	33.4167	opg
control	23.5133	34.65	opg
control	21.6133	32.94	opg
CUMS	21.9233	32.0067	Dastamp
CUMS	23.31	33.9367	Dastamp
CUMS	22.095	32.6267	Dastamp
control	23.88	34.11	Dastamp
control	21.4733	31.7433	Dastamp
control	21.1967	31.09	Dastamp
CUMS	21.72	25.2133	CTSK
CUMS	21.9233	25.1767	ctsk
CUMS	23.31	26.9833	ctsk
control	23.3733	26.6	CTSK
control	22.0533	25.76	CTSK
control	21.4733	24.9867	ctsk
