# Supplementary material for: Psychological stress disturbs bone metabolism via miR-335-3p/Fos signaling in osteoclast
Source: eLife. 2025 Jan 8;13:RP95944. doi: 10.7554/eLife.95944 (PMC11709429; doi:10.7554/eLife.95944)
Supplement: Figure 3—source data 1. [file elife-95944-fig3-data1.xlsx]

## Sheet: Fig.3D-1
CON	CUMS
1.3714	2.62376
1.03567	2.92521
1.45376	2.1195
		3

## Sheet: Fig.3E1~6
Groups	AVERAGE(GAPDH)	AVERAGE(Target gene)	GENE
control	21.65	25.0967	OCN
control	23.6167	26.4967	OCN
CUMS	23.0667	22.35	OCN
CUMS	21.9233	20.7033	OCN
CUMS	22.4867	21.9967	OCN
control	23.36	26.3667	OCN
CUMS	21.33	27.9267	SP7
CUMS	22.4433	28.7533	SP7
CUMS	21.9233	28.3067	SP7
control	21.4567	29.6833	SP7
control	25.88	34.38	SP7
control	21.65	28.95	SP7
CUMS	21.33	23.6933	OPN
CUMS	23.0667	25.3733	OPN
CUMS	21.9233	24.0667	OPN
control	25.88	28.5933	OPN
control	26.01	28.6	OPN
control	21.65	24.48	OPN
CUMS	21.33	28.12	RUNX2
CUMS	22.4867	30.3933	RUNX2
CUMS	22.3367	30.1967	RUNX2
control	23.36	31.1467	RUNX2
control	21.4567	29.2133	RUNX2
control	25.88	34.075	RUNX2
control	26.01	32.565	ALP
control	21.65	27.5433	ALP
control	23.6167	30.2933	ALP
CUMS	22.4433	28.68	ALP
CUMS	23.0667	29.54	ALP
CUMS	21.9233	27.5367	ALP
CUMS	21.8567	27.0033	dmp1
CUMS	22.6233	27.97	dmp1
CUMS	22.7167	28.22	dmp1
control	23.5133	30.53	dmp1
control	21.6133	28.8433	dmp1
control	25.93	32.19	dmp1

## Sheet: Fig.3I1~4
Groups	AVERAGE(GAPDH)	AVERAGE(Target gene)	GENE
CUMS	21.54	26.5033	Nfatc1
CUMS	22.81	28.0933	Nfatc1
CUMS	22.3533	27.1467	Nfatc1
CON	26.265	32.24	Nfatc1
CON	23.13	28.78	Nfatc1
CON	25.7467	32.1767	Nfatc1
CUMS	22.7067	23.8433	MMP-9
CUMS	22.81	24.24	MMP-9
CON	25.7467	28.58	MMP-9
CUMS	22.74	24.1833	MMP-9
CON	23.8933	25.6	MMP-9
CON	26.265	29.045	MMP-9
CUMS	22.3533	23.96	CA2
CUMS	21.72	20.88	CA2
CUMS	22.4033	21.4133	CA2
CUMS	22.32	21.78	CA2
control	23.3733	24.7233	CA2
control	22.0533	23.48	CA2
CUMS	21.54	24.0767	ACP5
CUMS	22.7067	25.85	ACP5
CUMS	22.3533	24.88	ACP5
CON	23.8933	27.6333	ACP5
CON	23.13	27.0233	ACP5
CON	21.5633	24.99	ACP5

## Sheet: Fig.3G 
Label	Area	Mean	StdDev	Min	Max	X	Y	XM	YM	OC.S/B	OC.S/B(%)
2CUMS_10X-2_RGB.tif (green)	3131872	154.658	37.26	52	214	2849.65	1643.88	2810.14	1619.26	0.147612	14.7612
4CUMS_10X-1_RGB.tif (green)	2935014	133.946	35.335	67	228	2714.93	1425.41	2604.6	1384.88	0.1318	13.18
40CUMS_10X_RGB.tif (green)	3088704	122.407	27.319	67	226	2538.58	1389.54	2515.7	1391.55	0.171364	17.1364
31CON_10X-2_RGB.tif (green)	5736690	141.938	39.093	5	220	2706.91	1507.56	2690.86	1495.77	0.0805715	8.05715
32CON_10x-2_RGB.tif (green)	4130580	122.35	35.657	9	214	3108.57	1402.72	3064.73	1412.91	0.0754403	7.54403
54CON_10X_RGB.tif (green)	3261395	126.642	37.627	3	193	2905.82	1559.63	2875.48	1569.13	0.0744657	7.44657

## Sheet: Fig.3H 
ID	AREA	NUMBER
2CUMS	2134371	20
4CUMS	2638144	29
31CON	2726684	16
32CON	1845289	13
54CON	1265690	8
40CUMS	2697511	37
