# Supplementary material for: Psychological stress disturbs bone metabolism via miR-335-3p/Fos signaling in osteoclast
Source: eLife. 2025 Jan 8;13:RP95944. doi: 10.7554/eLife.95944 (PMC11709429; doi:10.7554/eLife.95944)
Supplement: Figure 4—source data 1. [file elife-95944-fig4-data1.xls]

sRNA.readcount	CTRL_48.tpm	CTRL_59.tpm	CUMS_09.tpm	CUMS_10.tpm	CUMS_12.tpm
mmu-let-7a-1-3p	36.2694518	44.19584581	34.10005354	44.05607579	40.34946542
mmu-let-7a-2-3p	0.335828257	0	0	2.126845038	0.325398915
mmu-let-7a-5p	3740.287217	4738.47737	5168.771619	4767.778905	5676.584066
mmu-let-7b-3p	3.358282574	3.952474015	3.982488005	6.076700109	5.531781549
mmu-let-7b-5p	1320.812536	2088.343543	1775.194028	2077.016097	2121.600924
mmu-let-7c-1-3p	4.365767347	6.108368933	5.973732007	9.418885169	3.904786976
mmu-let-7c-5p	6135.918091	10060.12432	6697.300296	8590.630944	9468.783018
mmu-let-7d-3p	120.3944303	146.6008544	210.3251477	211.7729988	157.1676758
mmu-let-7d-5p	634.3795783	822.473911	806.7027264	871.0949606	878.9024685
mmu-let-7e-3p	7.556135792	15.98955397	9.458409011	13.97641025	7.484175037
mmu-let-7e-5p	394.9340307	651.6192388	505.2781656	545.3838348	462.3918577
mmu-let-7f-1-3p	4.029939089	1.976237008	2.240149503	6.988205125	6.182579379
mmu-let-7f-2-3p	5.876994505	0.718631639	0	0	0.650797829
mmu-let-7f-5p	28049.88729	38400.26129	45501.66779	37494.75885	40337.42566
mmu-let-7g-3p	1.34331303	1.437263278	3.982488005	1.519175027	0.650797829
mmu-let-7g-5p	16187.25784	18878.63282	20773.40415	17237.47136	20625.7356
mmu-let-7i-3p	13.09730204	14.01331696	20.90806202	10.63422519	22.45252511
mmu-let-7i-5p	28033.09587	33960.01605	45014.06192	36256.93503	37606.35257
mmu-let-7j	2.518711931	4.850763564	6.471543008	1.215340022	4.230185891
mmu-miR-100-3p	0.503742386	0	0	0	0
mmu-miR-100-5p	4500.770306	3412.422338	4550.490356	3574.315004	4303.400646
mmu-miR-101a-3p	9738.179895	8352.296226	8572.056524	11215.46156	7844.066237
mmu-miR-101a-5p	0.335828257	0	0	2.430680044	1.626994573
mmu-miR-101b-3p	4449.388583	3947.80291	5396.022341	5762.534713	4257.519399
mmu-miR-101b-5p	0	0.538973729	0	0	0
mmu-miR-101c	6.380736891	3.413500286	5.724826507	4.861360087	3.579388061
mmu-miR-103-2-5p	0	0.898289549	0	2.430680044	0
mmu-miR-103-3p	2859.91344	3820.605109	4583.096977	4231.510121	4728.371629
mmu-miR-106a-5p	5.876994505	7.006658481	6.222637507	19.14160534	9.76196744
mmu-miR-106b-3p	627.6630131	824.6298059	1131.77331	1046.407759	913.0693545
mmu-miR-106b-5p	366.7244571	499.808305	648.3988283	650.2069116	455.5584805
mmu-miR-107-3p	80.0950394	88.93066534	85.8723976	95.1003567	96.96887657
mmu-miR-10a-3p	22.33257912	23.17587036	45.05189555	50.1327759	32.86529038
mmu-miR-10a-5p	18457.62477	12740.62033	26827.03482	23995.67339	17330.0954
mmu-miR-10b-3p	6.54865102	6.467684752	2.737960503	2.734515049	1.952393488
mmu-miR-10b-5p	3318.486926	2531.918923	2696.891096	2471.393934	2530.30196
mmu-miR-1187	0	0	0	0.911505016	0
mmu-miR-1188-5p	0	0.898289549	0	0	0
mmu-miR-1191a	10.24276185	7.186316391	19.16572352	9.115050163	6.507978293
mmu-miR-1191b-5p	0.503742386	1.437263278	2.240149503	1.823010033	0.976196744
mmu-miR-1192	0	0	0	0.911505016	0
mmu-miR-1193-3p	0	0	0	0	0
mmu-miR-1193-5p	0	0	0	0	0
mmu-miR-1194	0.167914129	0	0	0	0
mmu-miR-1195	0	0	1.244527501	1.215340022	0
mmu-miR-1197-3p	0	0	0	0	0
mmu-miR-1198-3p	3.022454317	0.35931582	1.742338502	3.34218506	0
mmu-miR-1198-5p	110.6554108	137.6179589	194.6441012	156.4750278	145.1279159
mmu-miR-1199-5p	0	0	0	0	0
mmu-miR-12178-3p	1.175398901	0.17965791	0.746716501	0	0.650797829
mmu-miR-12182-3p	0.167914129	0	0	0	0
mmu-miR-12184-3p	0.335828257	0	0	0	0
mmu-miR-12184-5p	0.167914129	0	0	0	0
mmu-miR-12187-3p	0	0	0	0	1.301595659
mmu-miR-12189-3p	0	0	0	0	0.650797829
mmu-miR-12191-3p	4.533681475	13.83365905	5.227015506	14.58408026	15.94454682
mmu-miR-12193-5p	0	0	0	0	0.325398915
mmu-miR-12194-3p	0.671656515	0.718631639	0	0	0
mmu-miR-12199-3p	0	0	0	0.303835005	0
mmu-miR-12201-5p	0	0	0	0	0
mmu-miR-12202-3p	0	0	0	0.607670011	0
mmu-miR-12202-5p	0	0	0	0	0
mmu-miR-12204-5p	0	0	0	0	0
mmu-miR-12205-3p	0	0	0	0	0
mmu-miR-12206-5p	0	0	0	0.303835005	0
mmu-miR-122-3p	0	0	1.742338502	0	0
mmu-miR-122-5p	5.709080376	16.88784352	212.8142027	201.4426086	15.6191479
mmu-miR-122b-3p	5.709080376	16.88784352	212.8142027	201.4426086	15.6191479
mmu-miR-122b-5p	0	0	1.742338502	0	0
mmu-miR-1231-3p	0	0	0	0	0
mmu-miR-1231-5p	0	0.35931582	0	0	0
mmu-miR-124-3p	1.175398901	1.796579098	1.493433002	1.215340022	0.650797829
mmu-miR-124-5p	0	0.17965791	0	0	0.325398915
mmu-miR-1247-3p	1.175398901	0	0	0	0
mmu-miR-1247-5p	0.167914129	0.898289549	0.2489055	1.519175027	0
mmu-miR-1249-5p	0	0	0	0	0
mmu-miR-124b-3p	0	0.17965791	0	0	0.325398915
mmu-miR-125a-3p	1.847055416	12.21673787	3.235771504	3.038350054	3.253989147
mmu-miR-125a-5p	239.7813758	315.6589475	208.3339037	250.9677145	342.6450571
mmu-miR-125b-1-3p	22.33257912	57.67018904	46.29642305	40.41005572	52.06382635
mmu-miR-125b-2-3p	69.51644929	69.52761109	43.30955705	82.03545147	84.92911673
mmu-miR-125b-5p	1039.892199	1108.129988	804.9603879	1070.106889	1098.546736
mmu-miR-1264-3p	0	0	1.244527501	0.303835005	0.976196744
mmu-miR-1264-5p	0	0	0.746716501	0.607670011	0.976196744
mmu-miR-126a-3p	18435.46011	18945.2859	17731.53003	15226.38746	14349.76674
mmu-miR-126a-5p	2340.890868	1284.374397	1438.424886	1691.449475	1504.644581
mmu-miR-126b-3p	2340.890868	1284.374397	1438.424886	1691.449475	1504.644581
mmu-miR-126b-5p	47.18387017	52.28045175	27.37960503	22.1799554	28.30970558
mmu-miR-127-3p	292.8422405	312.0657893	127.4396161	273.4515049	168.8820367
mmu-miR-127-5p	23.67589215	30.90116048	14.68542452	17.0147603	16.92074356
mmu-miR-128-1-5p	3.358282574	2.874526556	5.227015506	2.734515049	6.833377208
mmu-miR-128-2-5p	0	0	1.244527501	0	0
mmu-miR-128-3p	180.6756025	144.6246174	343.4895904	200.5311036	336.1370788
mmu-miR-1291	3.190368446	2.515210737	3.982488005	0	5.531781549
mmu-miR-129-1-3p	2.182883673	1.257605368	0	3.34218506	2.277792403
mmu-miR-129-2-3p	0.671656515	0	1.493433002	4.557525082	0.650797829
mmu-miR-129-5p	36.43736593	40.24337179	19.16572352	48.00593086	34.49228495
mmu-miR-1298-3p	0	0	0.746716501	0.607670011	0
mmu-miR-1298-5p	1.34331303	0.538973729	89.8548856	130.9528873	111.2864288
mmu-miR-129b-3p	37.27693657	40.24337179	18.41900702	54.69030098	35.79388061
mmu-miR-129b-5p	0.671656515	0	1.493433002	3.949855071	0
mmu-miR-1306-3p	0.671656515	0.17965791	2.489055003	3.949855071	1.952393488
mmu-miR-1306-5p	4.533681475	6.288026842	3.235771504	15.79942028	8.460371781
mmu-miR-130a-3p	15.95184223	16.88784352	39.32706905	24.61063544	13.01595659
mmu-miR-130a-5p	2.182883673	3.054184466	3.484677004	1.823010033	8.134972867
mmu-miR-130b-3p	14.10478681	6.647342662	19.91244002	20.96461538	12.69055767
mmu-miR-130b-5p	38.78816373	37.72816105	54.01249356	60.15933108	40.34946542
mmu-miR-132-3p	20.4855237	26.76902856	15.92995202	19.44544035	17.89694031
mmu-miR-132-5p	7.89196405	11.31844832	4.729204505	12.45723522	9.76196744
mmu-miR-133a-3p	452.5285769	261.9412325	13.68980252	97.22720174	40.34946542
mmu-miR-133a-5p	12.42564552	10.42015877	0.746716501	2.126845038	1.952393488
mmu-miR-133b-3p	28.37748775	24.61313364	0	6.988205125	5.531781549
mmu-miR-134-3p	0.335828257	0	0	0	0
mmu-miR-134-5p	10.74650424	14.55229069	9.458409011	9.722720174	14.96835007
mmu-miR-135a-1-3p	5.20533799	5.030421474	11.69855851	4.557525082	13.3413555
mmu-miR-135a-2-3p	0.167914129	0	0	0	0
mmu-miR-135a-5p	24.68337692	24.07415991	50.77672206	69.27438124	43.27805565
mmu-miR-135b-3p	0	1.437263278	0	0	0
mmu-miR-135b-5p	1.847055416	4.671105654	1.991244002	3.646020065	1.952393488
mmu-miR-136-3p	48.86301146	45.45345117	18.17010152	30.07966554	31.23829581
mmu-miR-136-5p	39.79564851	85.51716506	24.14383353	61.07083609	39.37326867
mmu-miR-137-3p	1.175398901	0.35931582	0	0	0
mmu-miR-138-2-3p	0	0	1.742338502	0	0
mmu-miR-138-5p	1.511227158	1.976237008	0	0	2.603191317
mmu-miR-139-3p	39.62773438	23.71484409	35.34458104	46.48675583	39.04786976
mmu-miR-139-5p	2776.628032	1573.623632	3115.799053	2388.446978	2919.153663
mmu-miR-140-3p	25802.52459	40221.27387	33749.34569	40264.82259	34084.56011
mmu-miR-140-5p	1712.052456	1652.673112	1683.596804	1852.482028	2260.220861
mmu-miR-141-3p	3.190368446	4.491447745	11.69855851	17.0147603	13.01595659
mmu-miR-141-5p	0.503742386	1.616921188	2.737960503	0.911505016	0.650797829
mmu-miR-142a-3p	4145.799838	3931.274382	4503.696122	5864.015605	4772.95128
mmu-miR-142a-5p	3954.713559	4201.30022	3825.179728	5670.168871	5119.175726
mmu-miR-142b	4145.799838	3931.274382	4503.696122	5864.015605	4772.95128
mmu-miR-143-3p	50541.14526	34766.50041	32389.07713	36869.16257	28490.30197
mmu-miR-143-5p	47.18387017	61.26334724	34.10005354	38.8908807	26.35731209
mmu-miR-144-3p	695.8361494	1156.278307	1454.354838	2822.019531	1776.027276
mmu-miR-144-5p	417.9382664	664.0156345	1344.338607	1273.068673	1414.834481
mmu-miR-145a-3p	102.4276185	107.0761142	61.47965857	71.70506128	82.32592541
mmu-miR-145a-5p	841.7535272	1229.758392	740.4938634	747.1302784	611.4245607
mmu-miR-145b	0	0	0.2489055	0	0
mmu-miR-146a-3p	0	0.538973729	0	0	0
mmu-miR-146a-5p	2088.851761	2178.711472	3805.516194	2492.054715	2588.873765
mmu-miR-146b-3p	4.701595604	3.772816105	4.480299005	2.430680044	5.857180464
mmu-miR-146b-5p	7969.876205	6897.426472	8783.875105	8118.471345	8186.060496
mmu-miR-147-3p	67.33356561	51.3821622	41.56721855	83.25079149	68.98456991
mmu-miR-147-5p	25.69086169	14.37263278	16.17885752	21.26845038	18.87313705
mmu-miR-148a-3p	226862.7344	222141.7954	267878.322	251570.5231	291566.2133
mmu-miR-148a-5p	147.0927768	143.1873541	139.8848912	205.6962987	192.3107586
mmu-miR-148b-3p	2068.030409	1431.514225	1921.052651	1878.004169	2276.490807
mmu-miR-148b-5p	41.47478979	42.75858253	54.51030456	70.18588626	59.8734003
mmu-miR-149-3p	1.175398901	0	1.244527501	0	0
mmu-miR-149-5p	165.0595885	180.5561993	177.4696217	168.020758	214.4378848
mmu-miR-150-3p	3.694110832	1.077947459	3.484677004	3.038350054	3.579388061
mmu-miR-150-5p	289.651872	106.5371405	337.5158584	198.4042586	179.6202009
mmu-miR-151-3p	693.6532657	880.1441	851.5057165	924.2660865	755.2508809
mmu-miR-151-5p	31.39994207	32.87739749	45.05189555	52.25962094	24.73031751
mmu-miR-152-3p	2716.850603	4535.104617	3003.293766	3673.061381	3348.029433
mmu-miR-152-5p	32.23951271	54.07703084	42.56284055	49.52510589	45.23044914
mmu-miR-153-3p	3.526196703	1.077947459	2.489055003	7.595875136	1.952393488
mmu-miR-153-5p	1.007484772	0	0	0	0.650797829
mmu-miR-154-3p	0	0.718631639	0	0	0
mmu-miR-154-5p	0.503742386	0.538973729	0.2489055	3.646020065	2.603191317
mmu-miR-155-3p	0	0.898289549	7.218259508	1.215340022	0.325398915
mmu-miR-155-5p	116.3644912	75.99529584	198.8754947	108.1652619	131.4611615
mmu-miR-15a-3p	2.518711931	4.132131925	9.209503511	9.722720174	3.904786976
mmu-miR-15a-5p	101.4201337	79.58845403	134.9067812	109.076767	90.46089828
mmu-miR-15b-3p	71.69933296	67.37171617	103.0468771	87.20064656	62.80199053
mmu-miR-15b-5p	558.314478	417.8842982	737.2580919	703.0742026	622.8135227
mmu-miR-16-1-3p	409.3746458	473.7579081	973.7183171	999.0094979	771.1954278
mmu-miR-16-2-3p	10.07484772	13.83365905	30.61537654	17.0147603	34.81768387
mmu-miR-16-5p	3500.84167	3069.275731	5187.190626	4729.19186	3489.252562
mmu-miR-17-3p	34.42239639	56.23292576	49.28328906	66.8437012	40.67486433
mmu-miR-17-5p	634.3795783	829.6602274	698.6777393	849.5226752	795.9257453
mmu-miR-181a-1-3p	131.3088487	242.7178361	290.7216243	231.8261091	284.0732525
mmu-miR-181a-2-3p	32.07159858	21.37929126	26.63288853	40.41005572	22.1271262
mmu-miR-181a-5p	2283.800065	2386.755331	2291.17513	2413.969118	3129.686761
mmu-miR-181b-1-3p	6.884479277	12.57605368	8.46278701	10.9380602	16.26994573
mmu-miR-181b-2-3p	0	0	0.995622001	0	0
mmu-miR-181b-5p	598.9496971	770.3731171	661.0930088	721.0004679	851.2435608
mmu-miR-181c-3p	54.06834945	60.5447156	66.95557958	62.89384613	70.9369634
mmu-miR-181c-5p	15.95184223	22.0979229	22.65040053	30.07966554	18.87313705
mmu-miR-181d-5p	338.6827976	333.9840543	386.0524309	389.516477	359.8911996
mmu-miR-182-3p	0	0	0	0	0
mmu-miR-182-5p	110.3195826	178.9392781	138.8892692	127.6107023	109.3340353
mmu-miR-183-3p	0	0.17965791	0	0	0
mmu-miR-183-5p	43.82558759	72.22247973	87.3658306	50.4366109	84.60371781
mmu-miR-1839-3p	11.58607488	12.39639577	13.44089702	4.861360087	13.3413555
mmu-miR-1839-5p	753.4306955	1017.762059	1316.959002	1026.962318	1017.522406
mmu-miR-1843a-3p	15.7839281	13.83365905	8.46278701	10.33039018	7.158776123
mmu-miR-1843a-5p	287.9727307	236.0704935	267.8223183	309.0002005	273.6604872
mmu-miR-1843b-3p	34.25448226	45.09413535	45.30080105	46.18292083	48.48443829
mmu-miR-1843b-5p	187.2242535	154.6854603	189.1681802	201.7464436	170.8344302
mmu-miR-184-3p	42.81810282	54.61600457	47.78985606	64.10918615	37.09547627
mmu-miR-185-3p	2.014969545	14.55229069	5.973732007	14.58408026	8.460371781
mmu-miR-185-5p	374.448507	833.2533856	716.3500298	1008.124548	1053.316287
mmu-miR-186-3p	2.686626059	1.437263278	1.493433002	2.430680044	0.325398915
mmu-miR-186-5p	469.9916463	621.9756837	686.7302753	916.9740464	772.4970234
mmu-miR-187-3p	2.854540188	2.694868647	0	3.038350054	0.650797829
mmu-miR-188-3p	0	0	0	0	0.976196744
mmu-miR-188-5p	2.014969545	1.976237008	0	6.076700109	7.484175037
mmu-miR-18a-3p	3.86202496	5.389737293	2.489055003	2.126845038	6.507978293
mmu-miR-18a-5p	81.94209481	87.13408624	94.08627911	133.9912374	64.10358619
mmu-miR-18b-3p	0.503742386	0	0	0	0
mmu-miR-18b-5p	7.220307535	2.335552827	6.222637507	1.215340022	3.904786976
mmu-miR-1900	0	0	0	0	0
mmu-miR-190a-3p	0	0	0.746716501	0	1.626994573
mmu-miR-190a-5p	22.50049325	55.33463621	37.33582504	14.88791527	17.57154139
mmu-miR-190b-5p	14.27270094	37.90781896	23.14821153	21.57228539	19.52393488
mmu-miR-191-3p	6.884479277	3.054184466	8.21388151	11.54573021	11.71436093
mmu-miR-191-5p	2730.283733	2751.820204	3541.676364	3096.078705	3775.278208
mmu-miR-192-3p	0	0	0	0	0
mmu-miR-192-5p	2062.153415	1629.497242	1913.087675	2743.326264	2013.243085
mmu-miR-1927	0.167914129	0.898289549	0	1.823010033	0.650797829
mmu-miR-1929-5p	1.679141287	1.616921188	0.2489055	2.126845038	1.626994573
mmu-miR-1930-3p	0	1.616921188	0.995622001	1.823010033	0
mmu-miR-1930-5p	0	0	0.995622001	0	0.650797829
mmu-miR-1931	0.503742386	0	0	0.303835005	0.650797829
mmu-miR-1932	0.335828257	0	0	1.823010033	0
mmu-miR-1933-3p	2.518711931	1.437263278	1.244527501	0.911505016	0.325398915
mmu-miR-1933-5p	0.167914129	0	0	0	0
mmu-miR-1934-3p	0	0	0	3.038350054	0
mmu-miR-1934-5p	1.847055416	1.976237008	1.244527501	0	0
mmu-miR-1936	1.34331303	1.257605368	0.2489055	1.823010033	4.230185891
mmu-miR-1938	0	0	0	0	0.650797829
mmu-miR-193a-3p	0.671656515	3.413500286	0	3.038350054	0
mmu-miR-193a-5p	0.335828257	1.077947459	0	1.823010033	4.230185891
mmu-miR-193b-3p	4.869509733	10.06084295	0.995622001	5.469030098	1.952393488
mmu-miR-193b-5p	1.511227158	0.718631639	0.2489055	0	0
mmu-miR-1941-3p	1.007484772	0.538973729	0.995622001	0	1.301595659
mmu-miR-1941-5p	0	0.898289549	0	0.911505016	0.650797829
mmu-miR-194-2-3p	0.671656515	1.976237008	0.497811001	0	0
mmu-miR-1943-3p	0	0	0	0	1.952393488
mmu-miR-1943-5p	2.350797802	4.671105654	2.240149503	4.557525082	1.952393488
mmu-miR-1945	1.007484772	4.311789835	0.995622001	0.911505016	2.277792403
mmu-miR-194-5p	228.0273868	153.427855	205.0981322	194.1505685	205.0013162
mmu-miR-1946a	0	0	0	0	0.650797829
mmu-miR-1946b	0	0	0	0	0
mmu-miR-1947-5p	7.724049921	8.44392176	16.42776302	6.988205125	6.833377208
mmu-miR-1948-3p	0	0.718631639	0	0	0
mmu-miR-1948-5p	3.358282574	4.850763564	1.493433002	0.303835005	2.928590232
mmu-miR-1949	0	0	0	0	1.626994573
mmu-miR-1950	0	1.976237008	0	0.607670011	0.325398915
mmu-miR-1953	1.007484772	0	0	0	0
mmu-miR-1954	0.503742386	0.718631639	0.995622001	3.34218506	1.626994573
mmu-miR-1955-3p	2.686626059	0	0	0.911505016	0.325398915
mmu-miR-1955-5p	1.34331303	0.718631639	0	2.126845038	0.325398915
mmu-miR-1956	0	0	0.995622001	0	0
mmu-miR-1958	3.694110832	1.077947459	0.746716501	2.734515049	0
mmu-miR-195a-3p	90.33780125	100.9677453	97.57095611	85.37763653	123.0007897
mmu-miR-195a-5p	464.45048	707.8521645	748.2099339	832.2040799	687.5679067
mmu-miR-1960	0	0.17965791	1.244527501	4.557525082	4.230185891
mmu-miR-1962	0.503742386	0	0	0	0
mmu-miR-1964-3p	61.12074285	63.41924215	83.1344371	85.98530654	76.14334603
mmu-miR-1964-5p	0	0	0	0.911505016	0
mmu-miR-1966-3p	0	0	1.742338502	0.607670011	0.976196744
mmu-miR-1967	0	0.538973729	0.995622001	0	0
mmu-miR-1968-3p	0.335828257	0	0	0	0
mmu-miR-1968-5p	1.175398901	4.850763564	4.729204505	3.646020065	3.904786976
mmu-miR-1969	0	0	0.2489055	0	0
mmu-miR-196a-1-3p	0	0	0	0	0
mmu-miR-196a-2-3p	0.839570644	4.491447745	0.746716501	1.823010033	1.952393488
mmu-miR-196a-5p	166.0670733	222.4164923	179.7097712	197.7965885	186.1281792
mmu-miR-196b-3p	0	0.17965791	0	0	0
mmu-miR-196b-5p	337.5073987	300.5676831	339.7560079	314.4692306	328.9783027
mmu-miR-1970	0	0.538973729	0	1.215340022	2.928590232
mmu-miR-1970c-5p	0	0	0	0	1.301595659
mmu-miR-1981-3p	4.533681475	5.749053113	6.471543008	4.557525082	9.111169611
mmu-miR-1981-5p	557.4749073	984.8846614	739.0004304	729.2040131	979.7761321
mmu-miR-1982-3p	0	0	1.991244002	0	0
mmu-miR-1982-5p	0	0	1.493433002	0	0
mmu-miR-1983	11.58607488	24.07415991	9.956220012	17.31859531	11.0635631
mmu-miR-199a-3p	4090.724004	7349.445773	3300.984745	4527.141581	4922.309382
mmu-miR-199a-5p	2434.08321	3780.541396	2016.383458	2230.14894	2697.231604
mmu-miR-199b-5p	371.4260527	778.0984073	375.8473054	332.699331	398.2882715
mmu-miR-19a-3p	40.13147676	62.16163678	75.16946109	72.6165663	59.54800138
mmu-miR-19a-5p	0.335828257	0.898289549	0.746716501	2.126845038	0
mmu-miR-19b-1-5p	0.167914129	0	0	0	0
mmu-miR-19b-3p	325.0817532	240.2026254	440.5627355	379.4899218	398.6136705
mmu-miR-1a-1-5p	0.167914129	1.437263278	0	0	0
mmu-miR-1a-2-5p	0.839570644	0	0.746716501	0	0
mmu-miR-1a-3p	23122.11135	18486.08028	959.0328926	4576.059017	1931.567957
mmu-miR-1b-3p	0.839570644	0	0.746716501	0	0
mmu-miR-1b-5p	23114.3873	18471.34834	958.5350816	4568.766977	1931.567957
mmu-miR-200a-3p	34.08656813	37.54850314	57.74607607	127.0030323	59.8734003
mmu-miR-200a-5p	12.92938791	5.030421474	12.19636951	15.79942028	10.08736635
mmu-miR-200b-3p	83.45332197	89.11032325	164.5265357	212.6845038	107.3816418
mmu-miR-200b-5p	0.335828257	0.898289549	0	2.430680044	0
mmu-miR-200c-3p	58.09828854	66.29376871	136.4002142	173.4897881	80.37353192
mmu-miR-200c-5p	0	0.35931582	0.995622001	0	0
mmu-miR-201-5p	0	0	0.995622001	0	0
mmu-miR-202-3p	0	0	0	0	0
mmu-miR-202-5p	0	2.694868647	1.991244002	0.303835005	0
mmu-miR-203-3p	201.6648686	179.298594	230.2375878	274.6668449	193.6123542
mmu-miR-203-5p	2.854540188	4.132131925	1.742338502	0	0.325398915
mmu-miR-203b-3p	2.854540188	4.132131925	1.742338502	0	0.325398915
mmu-miR-203b-5p	20.14969545	9.881185038	13.19199152	42.84073577	13.99215333
mmu-miR-204-3p	0	0	0	0	0
mmu-miR-204-5p	24.34754866	20.84031753	20.65915652	19.74927535	25.38111534
mmu-miR-205-5p	2.182883673	3.233842376	3.484677004	21.26845038	0.325398915
mmu-miR-206-3p	42.81810282	45.9924249	6.471543008	52.86729095	17.57154139
mmu-miR-208a-5p	0	0	0.497811001	0	0
mmu-miR-20a-3p	2.182883673	4.132131925	0.995622001	3.34218506	1.626994573
mmu-miR-20a-5p	1784.255532	2458.25918	2589.115014	2439.491259	2543.968715
mmu-miR-20b-3p	0	0	0	0	1.952393488
mmu-miR-20b-5p	26.53043234	27.30800229	54.51030456	25.52214046	38.39707193
mmu-miR-210-3p	9.403191208	11.85742205	13.68980252	16.10325529	11.0635631
mmu-miR-210-5p	3.86202496	2.694868647	0.746716501	6.988205125	2.928590232
mmu-miR-211-3p	0	1.077947459	0	0	0
mmu-miR-211-5p	0.167914129	0	2.240149503	0	0
mmu-miR-212-3p	5.037423861	5.389737293	0.497811001	2.126845038	2.603191317
mmu-miR-212-5p	1.679141287	4.850763564	2.489055003	0.911505016	1.301595659
mmu-miR-214-3p	375.2880777	602.9319452	334.7778979	459.7023632	445.7965131
mmu-miR-214-5p	99.4051642	149.295723	94.83299561	100.5693868	130.1595659
mmu-miR-215-3p	0	0	0	0	0
mmu-miR-215-5p	43.99350172	30.18252884	28.87303803	23.09146041	44.90505022
mmu-miR-216a-3p	0	0	0	0	0
mmu-miR-216b-5p	0	0.538973729	0	0	0
mmu-miR-217-5p	0.335828257	0.538973729	0	0	0
mmu-miR-218-1-3p	0	0.17965791	0	0	0
mmu-miR-218-5p	2501.752604	3552.914824	2929.617738	3394.140846	3244.877977
mmu-miR-219a-1-3p	11.41816075	9.521869218	21.40587302	24.00296543	18.22233922
mmu-miR-219a-2-3p	4.197853218	2.515210737	0	9.115050163	0
mmu-miR-219a-5p	4.365767347	1.257605368	4.231393505	6.076700109	1.626994573
mmu-miR-219b-3p	0.335828257	0.17965791	0	1.519175027	0
mmu-miR-219b-5p	0.671656515	0.898289549	0	0.911505016	0
mmu-miR-219c-3p	0	0	1.244527501	0	0
mmu-miR-219c-5p	3.86202496	5.030421474	6.471543008	10.63422519	10.08736635
mmu-miR-21a-3p	9.067362951	16.34886979	8.71169251	11.2418952	8.134972867
mmu-miR-21a-5p	244599.8396	191658.1599	154098.6398	145372.5929	150868.2782
mmu-miR-221-3p	307.6186838	358.7768458	374.1049669	255.8290746	408.7010368
mmu-miR-221-5p	71.86724709	103.3032981	119.9724511	51.04428091	97.29427548
mmu-miR-222-3p	276.0508276	251.1617579	317.8523239	224.837904	319.2163353
mmu-miR-222-5p	10.41067598	13.65400114	13.68980252	14.88791527	9.111169611
mmu-miR-223-3p	3797.881763	3928.399855	3785.603754	3099.42089	3445.974506
mmu-miR-223-5p	582.8299408	377.1019526	942.3562241	501.023924	782.2589909
mmu-miR-22-3p	2554.645554	2641.150932	1794.857563	2670.405863	2075.719677
mmu-miR-224-3p	0.167914129	0	0	0	0
mmu-miR-224-5p	11.41816075	18.68442262	6.720448508	13.97641025	10.41276527
mmu-miR-22-5p	30.22454317	33.23671331	28.37522703	31.90267557	18.22233922
mmu-miR-23a-3p	2427.030816	2112.058387	1586.025848	1982.827245	1790.995626
mmu-miR-23a-5p	0.503742386	0.538973729	0	1.823010033	3.253989147
mmu-miR-23b-3p	1176.070558	1139.570122	730.7865488	1109.909275	888.339037
mmu-miR-23b-5p	0	3.054184466	1.742338502	0	2.277792403
mmu-miR-24-1-5p	20.4855237	58.92779441	22.65040053	24.00296543	38.72247085
mmu-miR-24-2-5p	657.551728	886.7914427	464.706569	584.2747155	656.6550098
mmu-miR-24-3p	6546.971879	4451.384031	4404.631733	5252.091904	4969.166826
mmu-miR-25-3p	5785.649219	5759.293614	8446.110341	8631.040999	8153.846004
mmu-miR-25-5p	1.34331303	6.647342662	7.716070509	7.899710141	7.158776123
mmu-miR-26a-1-3p	1.511227158	1.077947459	2.489055003	0	5.531781549
mmu-miR-26a-2-3p	6.716565149	12.03707996	17.17447952	17.0147603	16.59534465
mmu-miR-26a-5p	19470.4828	25702.21989	19313.32448	22194.23564	19022.82055
mmu-miR-26b-3p	4.701595604	3.233842376	5.724826507	7.292040131	6.507978293
mmu-miR-26b-5p	3481.363631	6775.259094	4309.798738	4364.893688	3565.721307
mmu-miR-27a-3p	1279.337747	770.3731171	661.0930088	962.8531322	1018.498603
mmu-miR-27a-5p	139.3687268	159.5362239	277.0318218	175.9204681	256.4143448
mmu-miR-27b-3p	13050.11817	14592.35441	8874.974518	13361.14436	11586.15376
mmu-miR-27b-5p	21.49300848	26.05039692	45.79861205	33.4218506	44.90505022
mmu-miR-28a-3p	77.24049921	84.97819133	70.93806758	84.46613151	57.92100681
mmu-miR-28a-5p	32.07159858	34.31466077	33.35333704	32.20651058	31.88909364
mmu-miR-290a-5p	0	0	0	0	0
mmu-miR-290b-3p	0	0	0	0	0
mmu-miR-291a-3p	0	0	0.2489055	0	0
mmu-miR-291a-5p	0	0	0	1.215340022	0
mmu-miR-291b-3p	0	0	0	0	0
mmu-miR-292a-3p	0	0.35931582	0	0	0.976196744
mmu-miR-292a-5p	0.167914129	0	0	0	0
mmu-miR-292b-3p	0.167914129	0	0	0	0
mmu-miR-292b-5p	0	0.35931582	0	0	0.976196744
mmu-miR-293-5p	0.167914129	0	0	0	0
mmu-miR-294-3p	0	0	0	0	0
mmu-miR-295-3p	0	0.17965791	0	0	0
mmu-miR-296-3p	11.25024662	17.96579098	3.733582504	16.40709029	8.460371781
mmu-miR-297a-5p	2.182883673	1.796579098	0.746716501	0	0.976196744
mmu-miR-297b-3p	24.17963453	18.3251068	12.94308602	14.58408026	16.59534465
mmu-miR-297b-5p	3.694110832	3.952474015	3.484677004	4.253690076	6.182579379
mmu-miR-297c-5p	0	0	0	0	1.626994573
mmu-miR-298-3p	0	0	0	0.607670011	0
mmu-miR-298-5p	5.876994505	17.96579098	12.69418051	29.16816052	7.484175037
mmu-miR-299a-3p	11.92190314	12.21673787	2.737960503	15.49558528	14.64295116
mmu-miR-299a-5p	3.022454317	2.155894917	0	0	1.301595659
mmu-miR-299b-3p	0	0	0	0	0.325398915
mmu-miR-299b-5p	0	0	0	0	0.325398915
mmu-miR-29a-3p	1344.488429	1333.241348	1228.846455	1339.912374	1210.158564
mmu-miR-29a-5p	5.20533799	4.311789835	8.96059801	4.557525082	9.111169611
mmu-miR-29b-1-5p	1.007484772	0.718631639	0	0.607670011	0.976196744
mmu-miR-29b-2-5p	0.503742386	0.538973729	0	4.861360087	1.301595659
mmu-miR-29b-3p	84.29289261	79.0494803	63.96871357	93.27734667	64.4289851
mmu-miR-29c-3p	17.46306939	14.91160651	9.956220012	16.10325529	13.01595659
mmu-miR-29c-5p	22.50049325	14.37263278	26.88179403	25.52214046	26.03191317
mmu-miR-300-3p	12.42564552	24.79279155	5.227015506	17.62243032	7.484175037
mmu-miR-300-5p	0	0	0	0	0
mmu-miR-301a-3p	5.709080376	10.24050086	9.209503511	7.899710141	8.460371781
mmu-miR-301a-5p	14.94435746	9.881185038	14.93433002	7.292040131	13.66675442
mmu-miR-301b-3p	4.701595604	2.874526556	3.733582504	4.557525082	7.484175037
mmu-miR-301b-5p	2.350797802	1.077947459	0.497811001	0	2.603191317
mmu-miR-302b-3p	0.167914129	0.17965791	0	0.303835005	0
mmu-miR-3057-3p	0	0	0	0	0
mmu-miR-3057-5p	0.335828257	0.35931582	1.244527501	0	0.976196744
mmu-miR-3058-3p	0	0.718631639	0	0.911505016	0.325398915
mmu-miR-3058-5p	0	0	0	0	0
mmu-miR-3059-5p	1.007484772	0	0	0	0
mmu-miR-3060-3p	0	0	0	0.303835005	1.952393488
mmu-miR-3061-3p	0.671656515	0	0	0	0.325398915
mmu-miR-3061-5p	2.182883673	0.538973729	6.720448508	4.861360087	5.206382635
mmu-miR-3062-5p	0.167914129	0	0	0	0.650797829
mmu-miR-3064-3p	0.335828257	0	3.484677004	0	0.650797829
mmu-miR-3064-5p	2.182883673	1.976237008	1.991244002	0.303835005	0.976196744
mmu-miR-3065-3p	32.91116923	23.17587036	18.91681802	20.96461538	29.28590232
mmu-miR-3065-5p	8.059878178	4.850763564	3.235771504	6.076700109	4.230185891
mmu-miR-3066-3p	0	0.538973729	0.995622001	0	0
mmu-miR-3066-5p	7.052393406	8.44392176	13.93870802	21.87612039	5.531781549
mmu-miR-3067-5p	0	0	0	0	0
mmu-miR-3068-3p	43.48975934	54.61600457	55.00811556	64.10918615	44.57965131
mmu-miR-3068-5p	85.46829152	79.58845403	75.16946109	106.9499219	83.30212215
mmu-miR-3069-3p	1.34331303	1.257605368	1.244527501	3.038350054	2.928590232
mmu-miR-3069-5p	0	0	0.2489055	0	0
mmu-miR-3071-3p	47.18387017	91.08656026	26.13507753	68.97054623	47.83364046
mmu-miR-3071-5p	48.86301146	45.45345117	18.17010152	30.07966554	31.23829581
mmu-miR-3072-3p	0.671656515	1.257605368	0.995622001	0	0
mmu-miR-3074-1-3p	4.533681475	19.22339635	8.21388151	5.469030098	11.38896201
mmu-miR-3074-2-3p	653.8576172	882.8389687	458.9817425	583.3632104	655.3534141
mmu-miR-3074-5p	6541.262798	4448.329846	4399.653623	5246.015204	4967.539831
mmu-miR-3075-5p	0.503742386	0	0	0	0
mmu-miR-3076-3p	0.335828257	0	0	2.430680044	0.976196744
mmu-miR-3076-5p	0	0	0	0	0
mmu-miR-3077-3p	0	0.17965791	0	0	0
mmu-miR-3079-5p	0	0	0	0.607670011	0.325398915
mmu-miR-3081-3p	29.38497253	49.76524101	10.70293651	14.58408026	34.81768387
mmu-miR-3082-3p	0.839570644	0	0	3.34218506	0
mmu-miR-3083-5p	0	0	0	0.607670011	0
mmu-miR-3083b-3p	0	0	0	0.607670011	0
mmu-miR-3084-3p	1.679141287	0.898289549	1.742338502	0.607670011	3.904786976
mmu-miR-3084-5p	2.518711931	2.515210737	5.724826507	3.34218506	0.650797829
mmu-miR-3085-3p	0	0	0	0	0.650797829
mmu-miR-3086-5p	0	1.077947459	0	0	0.976196744
mmu-miR-3087-3p	0.167914129	0.17965791	0	1.215340022	0
mmu-miR-3088-3p	0	0.17965791	0	0	0
mmu-miR-3088-5p	0	0	0	0	0
mmu-miR-3089-3p	0	1.437263278	0	0	0
mmu-miR-3091-3p	0	0	0	0	0.325398915
mmu-miR-3092-3p	0.335828257	0	0	0	1.952393488
mmu-miR-3094-5p	0.503742386	0	0	0	0
mmu-miR-3095-3p	0	0	0	0	0
mmu-miR-3095-5p	0.671656515	0	0	0	0
mmu-miR-3097-3p	2.014969545	0	0	2.734515049	0
mmu-miR-3097-5p	0	0	0.2489055	0	1.301595659
mmu-miR-3098-3p	0.839570644	0.17965791	0.995622001	2.126845038	2.928590232
mmu-miR-3098-5p	2.686626059	1.437263278	2.489055003	6.68437012	5.206382635
mmu-miR-3099-3p	0	0	0	0	0
mmu-miR-30a-3p	161.8692201	197.8033587	217.7923128	192.0237234	246.0015795
mmu-miR-30a-5p	16346.1046	23740.35551	22851.01836	24414.35803	21717.77436
mmu-miR-30b-3p	63.63945478	61.26334724	108.5227981	88.71982159	80.04813301
mmu-miR-30b-5p	788.6926626	750.9700629	648.1499228	775.0830989	585.3926475
mmu-miR-30c-1-3p	15.7839281	19.40305426	30.36647104	22.1799554	33.84148713
mmu-miR-30c-2-3p	58.93785918	79.58845403	126.6928996	108.1652619	68.00837316
mmu-miR-30c-5p	3592.522784	3912.949275	4004.391689	3660.300311	4561.116587
mmu-miR-30d-3p	35.42988116	39.88405597	47.04313955	52.56345594	58.57180464
mmu-miR-30d-5p	21771.24219	26066.02716	28534.02874	28479.06273	33342.32519
mmu-miR-30e-3p	464.2825659	432.2569309	645.4119622	621.0387511	567.4957072
mmu-miR-30e-5p	4023.558352	5367.100397	5406.476372	6634.541179	6515.787867
mmu-miR-30f	188.3996524	192.0543056	253.6347048	255.8290746	208.5807043
mmu-miR-3102-3p	2.182883673	3.233842376	0.746716501	3.34218506	2.603191317
mmu-miR-3102-5p.2-5p	0	1.616921188	0	0	0
mmu-miR-3103-3p	0	0	0	0.303835005	1.952393488
mmu-miR-3103-5p	0	0	0	0	0
mmu-miR-3109-3p	1.679141287	0.17965791	0.746716501	1.215340022	0.325398915
mmu-miR-3109-5p	0.503742386	0	0	0	0
mmu-miR-3110-5p	0.335828257	0	0	0	0
mmu-miR-3112-3p	0	0	0	0.303835005	0
mmu-miR-3112-5p	0	0	2.489055003	0	0.976196744
mmu-miR-3113-5p	0	0	0	0	0
mmu-miR-31-3p	0	0.17965791	0.497811001	1.215340022	0.325398915
mmu-miR-31-5p	13.76895855	8.803237579	13.44089702	10.02655518	12.69055767
mmu-miR-320-3p	209.7247468	377.8205843	317.8523239	410.7849274	328.3275049
mmu-miR-320-5p	0	0	0	0	0
mmu-miR-322-3p	438.4237901	437.4670103	491.3394576	526.8498994	545.6939799
mmu-miR-322-5p	103.4351033	49.40592519	85.6234921	47.70209585	67.68297425
mmu-miR-323-3p	1.847055416	1.437263278	0.497811001	1.823010033	0
mmu-miR-323-5p	0	0	0	0	0
mmu-miR-32-3p	11.58607488	8.26426385	6.471543008	7.899710141	15.6191479
mmu-miR-324-3p	0.671656515	1.257605368	0	0	1.626994573
mmu-miR-324-5p	10.07484772	6.108368933	7.467165009	13.06490523	4.88098372
mmu-miR-32-5p	155.3205691	194.2102005	161.7885752	195.0620735	190.0329662
mmu-miR-326-3p	18.63846829	16.88784352	14.93433002	22.78762541	19.84933379
mmu-miR-328-3p	120.058602	153.9668287	158.3038982	192.0237234	187.7551738
mmu-miR-328-5p	0	0.718631639	1.493433002	3.949855071	0.325398915
mmu-miR-329-3p	0.503742386	6.827000572	0	1.823010033	0.976196744
mmu-miR-329-5p	4.365767347	8.26426385	1.244527501	3.34218506	3.253989147
mmu-miR-330-3p	10.91441837	13.29468532	16.92557402	8.507380152	22.77792403
mmu-miR-330-5p	59.94534395	40.4230297	46.54532855	49.82894089	54.01621983
mmu-miR-331-3p	9.067362951	18.86408053	10.45403101	14.28024526	9.76196744
mmu-miR-331-5p	3.86202496	4.311789835	4.231393505	15.79942028	8.134972867
mmu-miR-33-3p	3.526196703	1.616921188	0.497811001	0	6.833377208
mmu-miR-335-3p	72.70681773	53.71771502	25.13945553	24.61063544	16.59534465
mmu-miR-335-5p	13.60104443	25.6910811	18.66791252	21.26845038	11.38896201
mmu-miR-33-5p	6.044908634	7.006658481	6.222637507	18.53393533	12.03975984
mmu-miR-337-3p	0	1.976237008	0	0	0
mmu-miR-337-5p	8.899448822	7.365974301	6.720448508	17.92626532	5.206382635
mmu-miR-338-3p	8.059878178	4.850763564	3.235771504	6.076700109	4.230185891
mmu-miR-338-5p	35.76570942	23.35552827	22.65040053	27.04131548	30.26209906
mmu-miR-339-3p	31.5678562	33.59602913	22.40149503	20.05311036	58.57180464
mmu-miR-339-5p	131.1409345	169.4174089	104.2914046	107.2537569	123.3261887
mmu-miR-340-3p	692.4778668	474.6561976	772.3537674	517.1271793	773.7986191
mmu-miR-340-5p	9491.849868	8199.407344	9046.968219	10842.35217	10165.46209
mmu-miR-341-3p	5.876994505	12.03707996	3.484677004	7.292040131	6.833377208
mmu-miR-341-5p	0	0	0.2489055	0	0
mmu-miR-342-3p	300.5662904	274.1579703	526.1862276	403.4928872	423.9947858
mmu-miR-342-5p	4.533681475	3.593158196	2.986866003	4.557525082	11.38896201
mmu-miR-344-3p	0.167914129	0	0	2.126845038	1.301595659
mmu-miR-344c-3p	0	0	0	1.215340022	0
mmu-miR-345-3p	14.6085292	20.66065962	9.458409011	18.53393533	22.1271262
mmu-miR-345-5p	9.235277079	21.91826499	14.93433002	18.53393533	9.111169611
mmu-miR-346-5p	0.839570644	1.616921188	0.2489055	0.911505016	0
mmu-miR-3470a	10.24276185	7.186316391	9.209503511	29.77583053	9.76196744
mmu-miR-3470b	19.3101248	25.15210737	22.89930603	45.87908582	32.53989147
mmu-miR-3471	0.167914129	0.898289549	0	0	1.301595659
mmu-miR-3472	0	0	1.493433002	0	0
mmu-miR-3473a	2.014969545	3.772816105	0	12.76107023	1.952393488
mmu-miR-3473b	53.39669293	102.0456928	50.03000556	335.433846	103.4768549
mmu-miR-3473d	0.167914129	0.538973729	0	0	3.904786976
mmu-miR-3473e	2.686626059	4.491447745	9.209503511	23.09146041	9.436568525
mmu-miR-3473f	2.518711931	3.233842376	10.95184201	10.02655518	11.71436093
mmu-miR-3473g	0	0.35931582	0	0	0
mmu-miR-3473h-5p	0.503742386	3.054184466	1.244527501	2.126845038	0.650797829
mmu-miR-3474	0.839570644	1.976237008	4.480299005	0	0
mmu-miR-34a-3p	0	0	0	0	0
mmu-miR-34a-5p	26.86626059	31.44013421	26.38398303	34.94102563	13.01595659
mmu-miR-34b-3p	15.44809984	22.0979229	12.44527501	14.58408026	9.436568525
mmu-miR-34b-5p	0.167914129	1.257605368	1.991244002	1.519175027	0
mmu-miR-34c-3p	5.20533799	9.521869218	5.227015506	8.203545147	2.603191317
mmu-miR-34c-5p	128.9580509	206.7862542	122.4615061	210.2538238	152.2866921
mmu-miR-350-3p	41.64270392	44.91447745	54.26139906	38.58704569	46.5320448
mmu-miR-350-5p	6.884479277	6.467684752	4.978110006	3.949855071	8.460371781
mmu-miR-351-3p	1.007484772	2.155894917	1.244527501	5.469030098	1.952393488
mmu-miR-351-5p	96.71853814	170.1360406	103.2957826	120.0148271	123.9769865
mmu-miR-3535	56.25123312	71.86316391	112.0074751	70.48972126	92.08789285
mmu-miR-3544-5p	0	1.976237008	0	0	0
mmu-miR-3547-3p	0	0	0	0	0
mmu-miR-3569-3p	0	0	0	0	0
mmu-miR-3569-5p	0	0	0	0.607670011	0
mmu-miR-3572-3p	0	0	0	0	0
mmu-miR-361-3p	181.1793449	201.7558327	222.7704228	192.3275584	196.2155455
mmu-miR-361-5p	78.41589811	86.4154546	74.92055559	78.0855964	64.75438402
mmu-miR-3618-3p	0	0	0	0	0
mmu-miR-362-3p	15.7839281	17.96579098	11.44965301	21.26845038	12.69055767
mmu-miR-362-5p	42.14644631	47.42968818	48.78547806	40.10622072	24.73031751
mmu-miR-363-3p	11.41816075	9.521869218	12.69418051	6.076700109	9.76196744
mmu-miR-363-5p	1.175398901	0.35931582	3.235771504	0	3.253989147
mmu-miR-365-1-5p	3.694110832	13.65400114	8.71169251	3.34218506	4.88098372
mmu-miR-365-2-5p	0.839570644	1.437263278	1.244527501	0	2.928590232
mmu-miR-365-3p	21.99675086	29.28423929	27.13069953	16.7109253	19.84933379
mmu-miR-369-3p	0.671656515	1.437263278	0	0.911505016	1.952393488
mmu-miR-369-5p	2.686626059	1.257605368	0	3.34218506	0
mmu-miR-370-3p	11.75398901	10.9591325	3.982488005	15.79942028	4.555584805
mmu-miR-374b-5p	953.9201652	968.1764758	1424.735084	1718.490791	1365.699245
mmu-miR-374c-3p	953.0805946	959.5528961	1420.254785	1715.148606	1361.794458
mmu-miR-374c-5p	0.167914129	0.718631639	0	6.076700109	0.976196744
mmu-miR-375-3p	7.89196405	8.44392176	5.724826507	23.09146041	8.785770696
mmu-miR-376a-3p	0.167914129	0	0	0	0
mmu-miR-376a-5p	1.007484772	0.17965791	0.995622001	0	0
mmu-miR-376b-3p	1.175398901	1.437263278	0.2489055	4.861360087	4.230185891
mmu-miR-376b-5p	6.380736891	7.725290121	4.729204505	11.2418952	5.206382635
mmu-miR-376c-3p	4.365767347	3.952474015	9.458409011	2.430680044	3.253989147
mmu-miR-377-3p	0	0	0.497811001	0	0.650797829
mmu-miR-377-5p	0.167914129	0	0	0	0.325398915
mmu-miR-378a-3p	7052.057578	15278.28831	7614.019254	11618.65061	8233.243339
mmu-miR-378a-5p	48.86301146	54.97532039	26.63288853	62.89384613	40.67486433
mmu-miR-378b	9.571105337	15.27092233	7.716070509	20.96461538	15.94454682
mmu-miR-378c	562.0085888	842.5955969	410.44517	916.6702114	503.7175199
mmu-miR-378d	0	0.17965791	0	0	0
mmu-miR-379-3p	5.541166248	3.772816105	3.235771504	12.15340022	5.206382635
mmu-miR-379-5p	342.5448226	385.9051902	202.3601717	398.3276921	227.7792403
mmu-miR-380-3p	2.014969545	1.257605368	0	0	0.325398915
mmu-miR-380-5p	1.679141287	1.976237008	0	0	1.301595659
mmu-miR-381-3p	30.72828555	51.56182011	15.92995202	37.37170567	28.63510449
mmu-miR-381-5p	0.671656515	0	0	0	0
mmu-miR-382-3p	11.41816075	15.27092233	2.489055003	4.557525082	12.03975984
mmu-miR-382-5p	9.067362951	16.70818561	7.964976009	10.02655518	11.71436093
mmu-miR-383-5p	0	0	0	1.519175027	0
mmu-miR-384-3p	0.167914129	0	0	0	0
mmu-miR-384-5p	0	0	0	0	0
mmu-miR-409-3p	2.350797802	6.288026842	5.227015506	8.811215158	4.555584805
mmu-miR-409-5p	1.679141287	5.749053113	1.244527501	3.34218506	6.182579379
mmu-miR-410-3p	2.518711931	5.389737293	1.244527501	0	1.301595659
mmu-miR-411-3p	6.884479277	5.569395203	1.991244002	16.40709029	6.507978293
mmu-miR-411-5p	282.9353069	252.5990212	112.5052861	265.5517948	220.2950652
mmu-miR-412-5p	0.839570644	1.257605368	0	0	0
mmu-miR-421-3p	32.57534097	27.12834438	43.06065155	36.15636565	28.96050341
mmu-miR-421-5p	0	0.17965791	0	0	0.976196744
mmu-miR-423-3p	575.6096332	565.0241263	505.0292601	470.3365884	535.2812146
mmu-miR-423-5p	333.981202	360.2141091	426.6240275	557.84107	379.4151345
mmu-miR-425-3p	38.95607786	32.15876585	55.50592656	42.23306576	36.11927953
mmu-miR-425-5p	1000.600293	1196.880995	1306.504971	1133.000735	1361.469059
mmu-miR-429-3p	9.235277079	4.311789835	4.978110006	13.36874024	5.531781549
mmu-miR-431-3p	0	0	0	0.303835005	0
mmu-miR-431-5p	2.350797802	1.257605368	0	3.646020065	1.952393488
mmu-miR-433-3p	2.014969545	1.976237008	1.742338502	0.303835005	0.650797829
mmu-miR-433-5p	0	0	0	0	0
mmu-miR-434-3p	23.84380628	33.59602913	9.707314511	28.56049051	16.26994573
mmu-miR-434-5p	187.7279959	214.5115443	95.08190111	197.7965885	147.7311073
mmu-miR-448-3p	0	0	0.2489055	0.303835005	0.325398915
mmu-miR-448-5p	0	0	0	0.303835005	0
mmu-miR-449a-5p	0.671656515	2.335552827	5.475921006	3.34218506	5.206382635
mmu-miR-449c-5p	0	0	0	0	0
mmu-miR-450a-1-3p	1.175398901	2.694868647	0.995622001	0.911505016	0.976196744
mmu-miR-450a-2-3p	0	0.898289549	0	0	0
mmu-miR-450a-5p	246.6658551	209.8404386	221.2769898	404.7082272	284.3986514
mmu-miR-450b-3p	5.373252119	2.874526556	3.982488005	5.165195092	0.650797829
mmu-miR-450b-5p	184.8734557	119.6521679	164.2776302	225.445574	170.5090313
mmu-miR-451a	6925.954067	15907.45031	27907.7825	23907.56124	17555.59685
mmu-miR-451b	0	0	0	0	0
mmu-miR-452-5p	0.503742386	0.538973729	1.244527501	0	1.952393488
mmu-miR-455-3p	50.37423861	125.5808789	96.82423961	87.20064656	134.0643528
mmu-miR-455-5p	969.2003509	2184.280867	959.5307036	1581.157368	1546.295642
mmu-miR-463-3p	0	0.17965791	0	1.215340022	0
mmu-miR-463-5p	0	0.718631639	0	0.303835005	0
mmu-miR-465a-3p	2.854540188	4.311789835	0.497811001	6.988205125	1.301595659
mmu-miR-465a-5p	2.350797802	0.718631639	0.995622001	2.734515049	0.650797829
mmu-miR-465b-5p	23.50797802	32.87739749	10.45403101	39.1947157	15.6191479
mmu-miR-465c-5p	23.17214976	22.0979229	12.19636951	14.28024526	11.0635631
mmu-miR-466a-3p	76.06510031	81.38503313	42.81174605	78.3894314	72.23855906
mmu-miR-466a-5p	0	0	0	0	0
mmu-miR-466b-3p	76.56884269	82.28332268	42.81174605	78.3894314	71.58776123
mmu-miR-466b-5p	15.61601397	8.982895489	12.44527501	13.67257524	11.71436093
mmu-miR-466c-5p	13.4331303	12.03707996	15.43214102	16.10325529	16.59534465
mmu-miR-466d-3p	32.07159858	35.57226614	22.65040053	40.71389073	26.682711
mmu-miR-466d-5p	2.350797802	0.17965791	0.497811001	0	1.301595659
mmu-miR-466e-5p	3.022454317	3.772816105	4.978110006	3.34218506	3.253989147
mmu-miR-466f	2.518711931	1.976237008	3.733582504	6.380535114	3.253989147
mmu-miR-466f-3p	6.380736891	10.59981668	10.45403101	2.430680044	5.531781549
mmu-miR-466f-5p	2.350797802	1.976237008	3.733582504	6.380535114	3.253989147
mmu-miR-466g	0.503742386	0.538973729	0.995622001	0.303835005	1.952393488
mmu-miR-466h-3p	9.403191208	7.365974301	6.222637507	3.34218506	7.158776123
mmu-miR-466h-5p	4.701595604	2.874526556	2.240149503	2.430680044	3.253989147
mmu-miR-466i-3p	2.182883673	1.976237008	1.493433002	4.253690076	2.277792403
mmu-miR-466i-5p	10.57859011	15.45058024	16.92557402	31.90267557	33.51608821
mmu-miR-466j	0.671656515	0.17965791	0	0	0
mmu-miR-466k	3.694110832	1.077947459	1.742338502	2.734515049	2.603191317
mmu-miR-466l-3p	0	0	0	2.126845038	0.325398915
mmu-miR-466m-3p	1.175398901	3.952474015	0	2.126845038	1.626994573
mmu-miR-466n-3p	0.503742386	1.437263278	0.746716501	0	0.976196744
mmu-miR-466n-5p	2.350797802	0.17965791	0.497811001	0	1.301595659
mmu-miR-466o-3p	0	0	0.995622001	0	0
mmu-miR-466p-5p	10.91441837	1.257605368	6.222637507	7.595875136	5.531781549
mmu-miR-466q	0.503742386	1.257605368	1.742338502	0	2.603191317
mmu-miR-467a-3p	108.4725271	91.8051919	103.0468771	92.06200665	101.1990625
mmu-miR-467a-5p	817.2380645	1020.27727	974.4650336	1015.112753	1404.421716
mmu-miR-467b-3p	0	0	0.497811001	2.734515049	0
mmu-miR-467b-5p	817.2380645	1020.27727	974.4650336	1015.112753	1404.421716
mmu-miR-467c-3p	0.335828257	1.796579098	2.489055003	3.038350054	0.325398915
mmu-miR-467c-5p	27.53791711	10.06084295	44.30517905	31.29500556	24.4049186
mmu-miR-467d-3p	108.4725271	91.8051919	103.0468771	92.06200665	101.1990625
mmu-miR-467d-5p	4.869509733	2.515210737	5.724826507	3.34218506	3.579388061
mmu-miR-467e-3p	1.175398901	0.17965791	0.995622001	2.734515049	1.952393488
mmu-miR-467e-5p	63.30362653	34.31466077	62.72418607	63.50151614	43.60345457
mmu-miR-467f	0	0.35931582	0	0	0
mmu-miR-467g	0	0	0	0	0.650797829
mmu-miR-467h	0.167914129	0	0	0	0
mmu-miR-468-3p	0.167914129	0	0	0	0.325398915
mmu-miR-468-5p	1.34331303	1.976237008	0.995622001	0.607670011	3.904786976
mmu-miR-470-5p	9.235277079	13.47434323	13.68980252	20.35694536	13.3413555
mmu-miR-471-3p	4.533681475	3.054184466	1.493433002	2.430680044	0
mmu-miR-471-5p	0.335828257	0.17965791	0.497811001	0.303835005	0.650797829
mmu-miR-483-5p	0	0.898289549	0	0	0.976196744
mmu-miR-484	80.43086765	90.18827071	98.31767261	141.8909475	117.1436093
mmu-miR-485-3p	0	0.898289549	0.2489055	0	0.650797829
mmu-miR-485-5p	0.335828257	0	0	3.34218506	1.301595659
mmu-miR-486a-3p	1656.640794	2659.835354	4696.348979	5322.27779	4098.073931
mmu-miR-486a-5p	1651.099628	2656.601512	4686.89057	5334.735025	4094.819942
mmu-miR-486b-3p	1645.558461	2640.072984	4651.297084	5299.794	4072.042018
mmu-miR-487b-3p	0	0	0	0.303835005	0
mmu-miR-488-3p	1.007484772	0	0	0	0.325398915
mmu-miR-489-3p	3.86202496	1.437263278	0	2.430680044	1.626994573
mmu-miR-490-3p	0	0.718631639	2.240149503	1.215340022	0.325398915
mmu-miR-490-5p	0.503742386	0	0	0	0
mmu-miR-491-3p	0	0	0	0	0
mmu-miR-491-5p	1.007484772	0	0.2489055	0.303835005	0
mmu-miR-493-3p	0	0	0	0	0
mmu-miR-493-5p	0.671656515	2.155894917	0.497811001	0	0.976196744
mmu-miR-494-3p	1.679141287	2.874526556	0	0.607670011	0
mmu-miR-495-3p	2.854540188	1.616921188	0.497811001	0	0
mmu-miR-496a-3p	0	0.898289549	0	0	0
mmu-miR-497a-3p	0.503742386	0.17965791	1.493433002	0	0
mmu-miR-497a-5p	127.2789096	147.6788018	133.9111592	140.0679375	132.4373583
mmu-miR-497b	26.86626059	38.44679269	35.34458104	35.54869564	39.69866759
mmu-miR-499-5p	0.503742386	4.491447745	4.729204505	5.469030098	2.277792403
mmu-miR-500-3p	4.029939089	4.671105654	9.707314511	6.380535114	3.253989147
mmu-miR-500-5p	0.671656515	0.35931582	1.244527501	0	0
mmu-miR-501-3p	52.55712229	61.62266305	71.93368958	58.33632104	71.58776123
mmu-miR-501-5p	1.175398901	0.35931582	0.746716501	1.215340022	1.626994573
mmu-miR-503-3p	25.52294756	25.87073901	23.64602253	16.40709029	19.84933379
mmu-miR-503-5p	56.58706138	51.20250429	52.76796606	64.10918615	73.54015471
mmu-miR-504-5p	1.511227158	3.593158196	4.480299005	0.911505016	1.301595659
mmu-miR-505-3p	1.34331303	2.694868647	0.2489055	0	4.230185891
mmu-miR-505-5p	0	0.718631639	0	1.519175027	0
mmu-miR-5099	6.54865102	3.772816105	11.20074751	7.292040131	8.785770696
mmu-miR-5100	0	0	0	0	0
mmu-miR-5101	0	1.077947459	0.497811001	0	0
mmu-miR-5103	0	0.35931582	2.489055003	0	0
mmu-miR-5104	1.175398901	0	0	0.303835005	0
mmu-miR-5104b-5p	0	0	0	0	0
mmu-miR-5107-3p	0	0	0	0	0
mmu-miR-5107-5p	1.175398901	0	0.497811001	0.911505016	1.301595659
mmu-miR-5113	2.182883673	3.772816105	7.218259508	8.811215158	6.833377208
mmu-miR-511-3p	10.07484772	11.85742205	12.94308602	18.53393533	11.38896201
mmu-miR-5114	2.854540188	3.772816105	2.737960503	7.595875136	1.301595659
mmu-miR-511-5p	6.380736891	8.623579669	8.96059801	6.380535114	9.111169611
mmu-miR-5116	0.671656515	0.17965791	0.2489055	0	0
mmu-miR-5118	0	0	0	0.303835005	0
mmu-miR-5119	0	0	0	2.126845038	0
mmu-miR-5120	0	0	0	0	0.325398915
mmu-miR-5121	1.679141287	0.898289549	1.244527501	4.253690076	0
mmu-miR-5122	1.175398901	2.515210737	0.497811001	3.038350054	0.325398915
mmu-miR-5123	6.54865102	3.233842376	8.46278701	3.34218506	9.436568525
mmu-miR-5125	0.167914129	0	0	0	0
mmu-miR-5126	1.175398901	1.976237008	1.244527501	3.646020065	2.603191317
mmu-miR-5128	0.503742386	0.35931582	1.991244002	0	2.603191317
mmu-miR-5129-3p	4.533681475	6.108368933	7.467165009	2.430680044	9.111169611
mmu-miR-5129-5p	0	0	0	0	0
mmu-miR-5130	0	0	0	0	0
mmu-miR-5132-3p	0	0	0	0	0
mmu-miR-5132-5p	1.679141287	0	0.746716501	1.823010033	1.626994573
mmu-miR-5133	0	0	0	0	0
mmu-miR-5134-5p	0	0	0	0	0
mmu-miR-532-3p	12.76147378	14.7319486	14.43651902	10.33039018	20.17473271
mmu-miR-532-5p	1495.107402	971.9492919	1388.643786	1292.817948	1136.943808
mmu-miR-539-5p	0	0	0	1.215340022	0
mmu-miR-540-3p	0.335828257	0.538973729	1.991244002	3.038350054	0.976196744
mmu-miR-540-5p	0.167914129	0	0	0	0.976196744
mmu-miR-541-3p	0.167914129	0.538973729	0	0	0
mmu-miR-541-5p	63.97528304	74.37837465	41.31831305	47.70209585	58.89720355
mmu-miR-542-3p	367.5640278	395.7863752	376.3451164	576.3750053	372.5817573
mmu-miR-542-5p	2.518711931	0.718631639	0.497811001	3.949855071	2.277792403
mmu-miR-543-3p	0	0.538973729	0	0.607670011	0.325398915
mmu-miR-543-5p	0	0	0	0	0
mmu-miR-547-3p	0	0.718631639	0	3.646020065	0
mmu-miR-551b-3p	0	0	0	0	0
mmu-miR-5615-3p	5.373252119	3.054184466	2.986866003	3.646020065	6.182579379
mmu-miR-5615-5p	5.373252119	2.874526556	2.986866003	3.646020065	4.555584805
mmu-miR-5617-5p	0	0	0	0	0
mmu-miR-5619-3p	0	0	0	0	0.976196744
mmu-miR-5619-5p	0	0	0	0	0
mmu-miR-5620-3p	0	0.35931582	0	2.734515049	0.325398915
mmu-miR-5620-5p	1.175398901	0.898289549	1.493433002	0	1.952393488
mmu-miR-5621-3p	0	0.35931582	0	0.303835005	0
mmu-miR-5622-5p	0	0	0	2.126845038	0.650797829
mmu-miR-5624-3p	4.869509733	5.389737293	1.244527501	2.734515049	2.603191317
mmu-miR-5624-5p	6.884479277	5.389737293	1.244527501	2.734515049	1.952393488
mmu-miR-5625-3p	0	0	0	0	0
mmu-miR-5627-3p	0	0	0	0	0
mmu-miR-5709-5p	1.175398901	0	0.995622001	1.519175027	1.626994573
mmu-miR-574-3p	192.2616774	229.4231508	137.6447417	199.3157636	171.1598291
mmu-miR-574-5p	57.93037441	64.67684752	66.95557958	58.64015605	61.82579379
mmu-miR-582-3p	14.10478681	14.19297487	19.16572352	107.5575919	98.92127006
mmu-miR-582-5p	0.839570644	1.257605368	0	5.165195092	1.952393488
mmu-miR-592-5p	1.847055416	0.17965791	22.89930603	0.303835005	11.0635631
mmu-miR-598-3p	8.563620564	8.623579669	9.209503511	5.165195092	8.134972867
mmu-miR-599	0	0.538973729	0.497811001	1.519175027	0
mmu-miR-615-3p	24.85129105	36.82987151	28.12632153	40.41005572	41.97645999
mmu-miR-615-5p	0.671656515	1.257605368	0	0	0.650797829
mmu-miR-6238	0.167914129	0	0	0	0
mmu-miR-6240	0	0.718631639	0	0	0.325398915
mmu-miR-6386	0	0	0	0	0
mmu-miR-6399	2.350797802	3.054184466	2.240149503	0	2.277792403
mmu-miR-6418-3p	0.167914129	0	0	0	0
mmu-miR-6516-3p	0.839570644	2.515210737	0	0.303835005	2.277792403
mmu-miR-6516-5p	2.014969545	3.413500286	1.991244002	3.34218506	4.555584805
mmu-miR-652-3p	384.6912689	271.4631017	287.7347583	308.0886955	255.7635469
mmu-miR-652-5p	9.067362951	5.749053113	13.44089702	16.7109253	4.230185891
mmu-miR-653-3p	1.34331303	1.796579098	1.742338502	1.519175027	0.650797829
mmu-miR-653-5p	272.0208885	369.3766625	209.3295257	284.6934001	151.6358942
mmu-miR-6537-3p	0	0.17965791	0.746716501	0	0
mmu-miR-6538	0.167914129	1.257605368	1.742338502	0.911505016	2.928590232
mmu-miR-6539	19.64595306	36.29089778	19.91244002	42.53690076	9.436568525
mmu-miR-6540-5p	0	0	0	0	0
mmu-miR-6541	0.839570644	0	0	0	0
mmu-miR-654-3p	0	0.538973729	0.746716501	0	0.325398915
mmu-miR-6546-3p	0	0	0	0	0
mmu-miR-6546-5p	0	0	0	0	0
mmu-miR-664-3p	9.403191208	8.44392176	9.707314511	9.115050163	4.88098372
mmu-miR-664-5p	8.227792307	11.13879041	11.69855851	21.57228539	10.08736635
mmu-miR-665-3p	0.503742386	0	0	0	0.650797829
mmu-miR-666-3p	0	0.538973729	0	0	0
mmu-miR-666-5p	0	1.616921188	0.2489055	0	0.650797829
mmu-miR-667-5p	0.671656515	0	0	0	0.325398915
mmu-miR-668-3p	0.839570644	1.077947459	0	0	0
mmu-miR-669a-3-3p	1.847055416	0.35931582	0.497811001	0	0.325398915
mmu-miR-669a-3p	113.1741228	88.75100743	66.70667408	54.99413598	68.65917099
mmu-miR-669a-5p	38.11650722	35.93158196	52.27015506	47.70209585	51.0876296
mmu-miR-669b-3p	2.182883673	3.233842376	2.489055003	0.607670011	0
mmu-miR-669b-5p	8.395706436	4.671105654	10.20512551	8.203545147	4.88098372
mmu-miR-669c-3p	0.335828257	0	0	0	1.626994573
mmu-miR-669c-5p	40.80313328	48.14831982	51.52343856	44.6637458	61.17499596
mmu-miR-669d-3p	0.503742386	1.437263278	0.746716501	1.823010033	2.277792403
mmu-miR-669d-5p	8.395706436	13.83365905	6.969354008	12.76107023	13.99215333
mmu-miR-669e-3p	3.190368446	0	1.493433002	3.038350054	0
mmu-miR-669e-5p	5.709080376	1.616921188	6.222637507	2.126845038	5.531781549
mmu-miR-669f-3p	5.541166248	6.108368933	2.240149503	3.34218506	6.182579379
mmu-miR-669f-5p	4.365767347	3.772816105	4.978110006	0.911505016	5.857180464
mmu-miR-669g	0	0	0	0	0
mmu-miR-669h-3p	0	0	0	0	0
mmu-miR-669h-5p	0	0.718631639	2.737960503	0	0.976196744
mmu-miR-669k-5p	0	0	0	0	0
mmu-miR-669l-3p	0	0	0.746716501	0	1.952393488
mmu-miR-669l-5p	10.24276185	9.342211309	14.68542452	15.79942028	16.26994573
mmu-miR-669m-3p	3.190368446	1.616921188	1.244527501	5.165195092	3.904786976
mmu-miR-669m-5p	2.686626059	1.077947459	1.991244002	0.911505016	0
mmu-miR-669o-5p	15.7839281	18.50476471	33.10443154	12.76107023	26.35731209
mmu-miR-669p-3p	1.847055416	1.796579098	0	1.823010033	0
mmu-miR-671-3p	10.07484772	26.40971274	35.09567554	22.1799554	26.35731209
mmu-miR-6715-5p	0	0	0	0.303835005	0
mmu-miR-671-5p	17.96681177	33.59602913	31.11318754	38.8908807	17.89694031
mmu-miR-672-5p	3.358282574	5.210079384	0.995622001	3.038350054	1.626994573
mmu-miR-673-3p	0.167914129	0.17965791	0.746716501	1.215340022	0
mmu-miR-673-5p	0.335828257	0.35931582	0	1.823010033	0
mmu-miR-674-3p	278.7374537	266.2530223	234.4689813	322.0651058	273.0096894
mmu-miR-674-5p	19.47803893	22.0979229	20.16134552	22.78762541	15.29374899
mmu-miR-675-3p	0	0	0	0	0
mmu-miR-675-5p	0	0	0	0	0.976196744
mmu-miR-676-3p	27.70583124	27.30800229	35.59348654	35.85253064	35.79388061
mmu-miR-676-5p	37.61276483	27.84697602	51.77234406	41.32156074	46.20664588
mmu-miR-677-3p	0.839570644	0	0.497811001	1.519175027	0
mmu-miR-677-5p	3.694110832	2.874526556	2.737960503	5.772865103	8.460371781
mmu-miR-679-5p	0.839570644	2.335552827	0	2.126845038	2.603191317
mmu-miR-682	0.167914129	0	0	0.303835005	0.650797829
mmu-miR-686	0	0	0	3.038350054	0
mmu-miR-6896-5p	0	0.538973729	0	0	0
mmu-miR-6897-5p	0	0	0	0	0
mmu-miR-6898-5p	0.167914129	0	0	0	0.325398915
mmu-miR-6899-3p	0.335828257	0	1.244527501	0	0.325398915
mmu-miR-690	5.373252119	8.803237579	17.67229052	27.34515049	18.87313705
mmu-miR-6900-3p	0	0.718631639	0	0.303835005	0
mmu-miR-6900-5p	0.167914129	0	0	0	0
mmu-miR-6901-5p	0	0	0	0	0
mmu-miR-6902-3p	0	0	0	0	0
mmu-miR-6902-5p	0	0	0	0	0.650797829
mmu-miR-6903-3p	1.007484772	1.796579098	0	0	0
mmu-miR-6903-5p	0	0	0	1.823010033	0
mmu-miR-6905-3p	0	0	0	0	0
mmu-miR-6910-3p	0.503742386	0	0	0	0
mmu-miR-6911-3p	0.839570644	1.616921188	0.2489055	0.911505016	2.277792403
mmu-miR-6911-5p	0.503742386	0	0	0	0
mmu-miR-6912-3p	0.167914129	0	0	0	0
mmu-miR-6913-3p	0.839570644	0	0	0	0
mmu-miR-6916-5p	0	0	0.995622001	0	0
mmu-miR-6919-5p	0	0.17965791	0	0	0
mmu-miR-6922-5p	0	0	0	0	0
mmu-miR-6924-5p	0.839570644	0	0	0	0
mmu-miR-6925-5p	1.007484772	0	0	0	0
mmu-miR-6928-3p	1.007484772	0	0	0	0
mmu-miR-6928-5p	0	0	0	0	0
mmu-miR-6929-3p	0	0.718631639	0	0	0
mmu-miR-6929-5p	0.335828257	0	0	0	0
mmu-miR-6932-5p	0	0	0.746716501	0	0.325398915
mmu-miR-6933-5p	0	0.35931582	1.244527501	0	0
mmu-miR-693-3p	4.533681475	0.538973729	8.71169251	1.823010033	1.301595659
mmu-miR-6935-3p	0	0	0.497811001	0	0
mmu-miR-6935-5p	0	0	0	0	0
mmu-miR-6936-3p	0	0	0	0	0
mmu-miR-6937-3p	0	0	0	0	0
mmu-miR-6937-5p	0	0	0	0	0
mmu-miR-694	0	0.17965791	0	0	0
mmu-miR-6942-5p	0	1.257605368	0	1.823010033	0
mmu-miR-6943-3p	0	0	0	0	0
mmu-miR-6943-5p	0	0	0	0	0
mmu-miR-6944-3p	0	0	0	0	0
mmu-miR-6945-3p	0	0	0	1.823010033	0
mmu-miR-6946-3p	0	0.17965791	0	0	0.325398915
mmu-miR-6946-5p	0	0	0	0	0
mmu-miR-6947-5p	0.167914129	0	0	0	0
mmu-miR-6948-3p	0.335828257	0.17965791	0	0	1.626994573
mmu-miR-6948-5p	0.167914129	0.35931582	0.995622001	0	1.626994573
mmu-miR-6951-5p	0.335828257	0.17965791	0.995622001	0	0
mmu-miR-6952-3p	0	1.257605368	0.995622001	0	0.976196744
mmu-miR-6953-3p	0	0	0.995622001	0	0
mmu-miR-6955-5p	0.167914129	2.335552827	0	1.215340022	0
mmu-miR-6956-3p	0	0	0	0	0
mmu-miR-6957-3p	0.839570644	0	0	0	0.976196744
mmu-miR-6957-5p	0	0	0	0	0
mmu-miR-6959-5p	0	0	0.497811001	0	0
mmu-miR-696	0	0.17965791	0	0	0
mmu-miR-6960-5p	0.503742386	0	1.493433002	0	1.301595659
mmu-miR-6962-3p	0.503742386	0	0	0	0
mmu-miR-6963-3p	0	0	0	0	0
mmu-miR-6964-3p	0	0	0	0.607670011	0
mmu-miR-6964-5p	0	0	0	0.303835005	0
mmu-miR-6965-3p	0	0	0.497811001	0	2.277792403
mmu-miR-6966-5p	0.335828257	0	0	0	0
mmu-miR-6967-3p	0.503742386	0	0.746716501	0	0.325398915
mmu-miR-6967-5p	0	0.538973729	1.244527501	0.911505016	0.650797829
mmu-miR-6968-3p	0	0	0	0	0
mmu-miR-6970-3p	0.167914129	1.077947459	0	0	1.626994573
mmu-miR-6970-5p	0	0	0	0	0
mmu-miR-6972-3p	0.503742386	0	0	0	0
mmu-miR-6975-3p	0	0	0	0	0
mmu-miR-6977-3p	0.671656515	0	0	0	0
mmu-miR-6978-3p	0	0	0	0	1.301595659
mmu-miR-6979-3p	0	0	0.497811001	0	0
mmu-miR-6983-5p	0	0	0	0	0
mmu-miR-6984-5p	0	0	0	1.519175027	0
mmu-miR-6985-3p	0	0	0	0	0.976196744
mmu-miR-6986-5p	0	0	0	0	0
mmu-miR-6988-3p	0	0	0.746716501	0	0.976196744
mmu-miR-6989-3p	0	0	0	0	0.650797829
mmu-miR-6990-5p	0	0	0	0.607670011	0
mmu-miR-6992-5p	0.335828257	0	0	0	0.325398915
mmu-miR-6994-3p	0	1.257605368	1.493433002	0	0.325398915
mmu-miR-6995-3p	0	0.538973729	1.244527501	0	0
mmu-miR-6996-5p	0	0.35931582	0	0.911505016	0
mmu-miR-6997-5p	0	0	0	2.430680044	0
mmu-miR-6998-3p	0	0	0	0	0
mmu-miR-6999-3p	0	0	0.2489055	0	0
mmu-miR-6999-5p	0	0	0	0	0
mmu-miR-7002-5p	0	0	0.2489055	0	0
mmu-miR-7003-5p	0	0	0	0	0
mmu-miR-700-3p	5.20533799	12.9353695	6.969354008	20.35694536	9.76196744
mmu-miR-700-5p	8.227792307	7.545632211	5.724826507	6.68437012	10.73816418
mmu-miR-7006-3p	0	0	0	0	1.301595659
mmu-miR-7006-5p	0	0	0	0	0
mmu-miR-7007-3p	0	0	0	0	0
mmu-miR-7007-5p	0	0	0	2.430680044	0
mmu-miR-7010-5p	0	0	0	0	1.626994573
mmu-miR-7011-3p	0	0	0	0	0
mmu-miR-7011-5p	0	0.538973729	0	0	0
mmu-miR-7012-3p	0	0	0	0	0
mmu-miR-7012-5p	0	0	0.746716501	0	0
mmu-miR-7013-5p	0	0	0	0	0
mmu-miR-701-3p	0.167914129	0	0	0	0
mmu-miR-7014-5p	0	0.718631639	0	0	0
mmu-miR-7015-3p	0	0	2.737960503	1.519175027	0.650797829
mmu-miR-7015-5p	0	0	0.995622001	0	0.650797829
mmu-miR-701-5p	1.007484772	1.077947459	0.2489055	0.911505016	0
mmu-miR-7016-5p	0	0	0	0	0
mmu-miR-7017-5p	0	0	1.493433002	0	0
mmu-miR-7019-3p	0	0	0	0	0
mmu-miR-7020-5p	0	0	0	0	0
mmu-miR-7021-5p	2.350797802	0	2.986866003	1.215340022	3.904786976
mmu-miR-702-3p	0	0	0	0	0
mmu-miR-7025-3p	0	0	0	0	0
mmu-miR-702-5p	0.671656515	0	0	0	0
mmu-miR-7026-3p	0	0	0	0	0
mmu-miR-7026-5p	0	0	0	0	0
mmu-miR-7027-3p	0.335828257	0	0	0	0
mmu-miR-7029-3p	0	0	0	0	0
mmu-miR-7029-5p	0.167914129	0	0	0	0
mmu-miR-7031-5p	0	0.898289549	0	0	0
mmu-miR-7032-3p	0	0	0.2489055	0	0.976196744
mmu-miR-7032-5p	0	0	0	0	0
mmu-miR-7033-5p	0.167914129	0	0	0	0
mmu-miR-7034-5p	0	0	0	0	0
mmu-miR-7035-3p	0	0	0	2.430680044	0
mmu-miR-7035-5p	0	0	0	0	0
mmu-miR-7036b-5p	0	0.35931582	0.746716501	0	3.253989147
mmu-miR-7037-5p	0	0	0	0	0
mmu-miR-704	0	1.437263278	0.746716501	0	0.976196744
mmu-miR-7042-5p	0	0.718631639	0	0	0
mmu-miR-7043-3p	30.05662904	42.03995089	50.27891106	25.52214046	47.83364046
mmu-miR-7043-5p	0	0	1.742338502	1.215340022	0
mmu-miR-7046-5p	0	0	0	0	1.952393488
mmu-miR-7048-3p	0.335828257	0.538973729	0	0	0
mmu-miR-7048-5p	0	0	0	0	0
mmu-miR-7049-5p	0	0	0.995622001	0	0
mmu-miR-7050-5p	0	0	0	0	0
mmu-miR-7051-5p	0	0	0	0	0
mmu-miR-7053-3p	0	0	0	0	0
mmu-miR-7054-5p	0	0	0	0	0
mmu-miR-7057-3p	0	0.17965791	0	0	0
mmu-miR-7057-5p	0	0	0	0	0
mmu-miR-7058-5p	0	0	0	0	0
mmu-miR-7059-5p	0.335828257	2.335552827	0.995622001	3.34218506	5.857180464
mmu-miR-706	0	1.616921188	0	0	0
mmu-miR-7061-3p	0	0	0	0	0
mmu-miR-7061-5p	0	0	0	0	0
mmu-miR-7062-5p	1.175398901	0	2.240149503	0	0
mmu-miR-7063-5p	0.335828257	0.538973729	0	0	0.325398915
mmu-miR-7064-5p	0	0	0	0	0
mmu-miR-7067-5p	0	0	0	1.519175027	0
mmu-miR-7068-3p	0.671656515	0.898289549	0	0	0.976196744
mmu-miR-7069-3p	0	0	0	0	0
mmu-miR-7069-5p	0	0	0	0	0
mmu-miR-7073-5p	2.182883673	0.898289549	2.489055003	9.722720174	5.206382635
mmu-miR-7074-3p	0	0	0	0	0.325398915
mmu-miR-7075-3p	0	0.35931582	0	0	0
mmu-miR-7078-5p	0	0	0	0	0.325398915
mmu-miR-7079-3p	0	0	1.991244002	0	0
mmu-miR-7081-3p	0.503742386	0	0	0	0
mmu-miR-7083-5p	1.007484772	1.616921188	3.484677004	1.519175027	1.952393488
mmu-miR-708-3p	120.5623444	84.79853342	90.85050761	156.7788628	113.2388223
mmu-miR-7084-5p	0	0	0	0	0.976196744
mmu-miR-7085-3p	0	0	0	0	0
mmu-miR-708-5p	13.4331303	29.4638972	10.20512551	13.67257524	30.91289689
mmu-miR-7086-5p	0	0	0	0	0
mmu-miR-7088-3p	0	0	0	0	0
mmu-miR-709	0	0.538973729	0	0	0
mmu-miR-7090-5p	0	0.718631639	0	0	0
mmu-miR-7091-3p	1.847055416	0.718631639	0.497811001	0	0
mmu-miR-7091-5p	0.839570644	1.257605368	0.746716501	0.911505016	3.253989147
mmu-miR-7092-5p	0.671656515	0	0	0	0
mmu-miR-7093-3p	0	0	0	1.823010033	0
mmu-miR-7093-5p	0	0	0	0	0
mmu-miR-7094-3p	0.335828257	0	0	0	0
mmu-miR-7115-5p	2.182883673	0	0.497811001	2.126845038	0
mmu-miR-7118-3p	0	0	0	0	0
mmu-miR-712-5p	0.503742386	0	0.497811001	0.911505016	0
mmu-miR-719	0	0	0	0	0
mmu-miR-7210-5p	0.167914129	0.35931582	0.2489055	0.303835005	0.325398915
mmu-miR-7211-5p	0.503742386	0	0	0	0
mmu-miR-7212-5p	0	0	0	0	0
mmu-miR-7213-5p	0.503742386	0.17965791	0	0	0
mmu-miR-7214-5p	0	0	0	0.303835005	0.325398915
mmu-miR-7219-3p	1.34331303	1.437263278	3.235771504	5.165195092	0.976196744
mmu-miR-7219-5p	0	0	0	0	0
mmu-miR-7226-3p	0.335828257	0	0.746716501	2.430680044	0
mmu-miR-7227-3p	0	0	0	0	0.325398915
mmu-miR-7228-5p	1.175398901	0	0	0	0
mmu-miR-7230-3p	0	0	0	1.519175027	0
mmu-miR-7230-5p	0	0	0	2.126845038	0
mmu-miR-7235-3p	0	0.35931582	0	0	0
mmu-miR-7236-3p	0.503742386	0	0	3.949855071	1.626994573
mmu-miR-7237-3p	1.007484772	0	0.2489055	0.607670011	0
mmu-miR-7238-5p	0	0	0	0	0
mmu-miR-7240-5p	0	0	0	0	0
mmu-miR-7243-3p	0	0	0	0	0
mmu-miR-7243-5p	0	0	0	0	0
mmu-miR-741-3p	5.20533799	5.749053113	6.222637507	5.165195092	2.277792403
mmu-miR-741-5p	0	0	0.2489055	0	0
mmu-miR-743a-3p	4.869509733	1.437263278	1.244527501	0.607670011	4.88098372
mmu-miR-743a-5p	1.175398901	1.976237008	0.2489055	0	0.325398915
mmu-miR-743b-3p	6.54865102	7.186316391	3.733582504	4.557525082	8.785770696
mmu-miR-743b-5p	0.167914129	0.35931582	0	0.303835005	0.325398915
mmu-miR-744-3p	6.54865102	5.569395203	12.19636951	11.84956521	2.603191317
mmu-miR-744-5p	541.8588934	510.7674375	533.1555816	656.2836117	637.4564738
mmu-miR-758-3p	0.839570644	0.17965791	0.497811001	2.430680044	0
mmu-miR-760-3p	0	0	0.995622001	0.303835005	0
mmu-miR-761	0	0	0	0	0
mmu-miR-764-5p	0	0	0	0	0
mmu-miR-7646-5p	0	0.898289549	0	0	0
mmu-miR-7648-3p	0	0	0	0.911505016	0
mmu-miR-7649-3p	0	0	0.746716501	2.126845038	0.325398915
mmu-miR-7649-5p	9.739019465	6.827000572	16.67666852	2.430680044	10.73816418
mmu-miR-7650-5p	0	0	0	0	0
mmu-miR-7651-5p	0	0	0	0	0
mmu-miR-7652-3p	0	0.718631639	0	0	0.976196744
mmu-miR-7652-5p	0	0	0	0	0
mmu-miR-7653-3p	0	0	0	0	0.650797829
mmu-miR-7653-5p	0	1.257605368	1.244527501	0.607670011	0.650797829
mmu-miR-7655-5p	0	0	0	0.303835005	1.301595659
mmu-miR-7656-3p	0	1.437263278	0	0	0
mmu-miR-7656-5p	0	0	0	0	0
mmu-miR-7657-3p	0	0	0	0	0
mmu-miR-7657-5p	0	0	0.497811001	0	0
mmu-miR-7658-5p	0	0	0	0	0
mmu-miR-7659-5p	0	0	0	0	0
mmu-miR-7661-3p	0	0.898289549	0	0	0.325398915
mmu-miR-7662-5p	0	0	0.746716501	0	0
mmu-miR-7663-3p	0	0	0	0	0
mmu-miR-7664-3p	0	0.35931582	0	0	0
mmu-miR-7666-3p	0	0	0	0	0.325398915
mmu-miR-7667-3p	0	0	0.2489055	0	0
mmu-miR-7667-5p	0.167914129	0	0	0.607670011	0
mmu-miR-7668-3p	0	0	0	0	0
mmu-miR-7668-5p	0	0	0.497811001	0	0
mmu-miR-7669-3p	0.503742386	0	0	0	0
mmu-miR-7669-5p	1.679141287	0	0	0.607670011	0
mmu-miR-767	0	0	0.497811001	0	0
mmu-miR-7670-3p	0.167914129	1.796579098	1.991244002	1.823010033	0
mmu-miR-7671-3p	0	0	0	1.215340022	0
mmu-miR-7672-3p	0	0	0	0	0
mmu-miR-7673-5p	0	0.17965791	0	0.303835005	0
mmu-miR-7674-5p	0	0	0	0	0
mmu-miR-7675-3p	1.847055416	0.17965791	0	1.823010033	1.952393488
mmu-miR-7675-5p	0	0	0	0.607670011	0
mmu-miR-7676-3p	3.190368446	5.210079384	2.240149503	6.076700109	3.579388061
mmu-miR-7676-5p	0	0	0	0	0
mmu-miR-7677-3p	0	0	0	0	0
mmu-miR-7678-3p	1.175398901	0	0	0	0
mmu-miR-7683-5p	0	0	0	0	0
mmu-miR-7687-3p	0	0	0	0	0
mmu-miR-7688-5p	0.671656515	1.796579098	0.995622001	4.557525082	3.904786976
mmu-miR-7689-3p	0	0.35931582	1.742338502	0	0
mmu-miR-770-3p	0.839570644	0	0	0	0
mmu-miR-7a-1-3p	10.91441837	18.86408053	22.15258953	11.2418952	15.94454682
mmu-miR-7a-2-3p	0	0.17965791	0	0	0
mmu-miR-7a-5p	5979.254209	8551.896163	10916.74634	11092.10454	10255.27219
mmu-miR-7b-5p	0.167914129	0.17965791	0.2489055	1.519175027	1.301595659
mmu-miR-802-3p	0	0	0	0	1.626994573
mmu-miR-802-5p	0	0	0	0	0.325398915
mmu-miR-8091	0	0	0	1.215340022	0
mmu-miR-8093	0	0	0	1.519175027	0
mmu-miR-8094	0.335828257	1.077947459	4.231393505	1.519175027	0.325398915
mmu-miR-8096	0	0	0.2489055	0.303835005	0
mmu-miR-8097	2.014969545	1.796579098	3.733582504	1.215340022	4.555584805
mmu-miR-8101	0	0	0	0.607670011	0
mmu-miR-8102	0	0	0	0	0
mmu-miR-8103	0.839570644	1.796579098	2.240149503	1.823010033	0.976196744
mmu-miR-8105	0	0.718631639	0	0	0
mmu-miR-8106	0	0	0	1.823010033	0
mmu-miR-8107	0	0	0	0	1.952393488
mmu-miR-8108	0	0	1.742338502	0	0
mmu-miR-8111	0	0.17965791	0	0	0
mmu-miR-8112	2.854540188	1.976237008	2.737960503	6.076700109	0.650797829
mmu-miR-8114	2.182883673	1.616921188	3.733582504	2.734515049	3.253989147
mmu-miR-8116	0	0	0	0	0
mmu-miR-8117	0	0	0	0	0
mmu-miR-8118	0.503742386	0.718631639	0	2.734515049	2.928590232
mmu-miR-8120	2.014969545	3.952474015	0	2.430680044	2.277792403
mmu-miR-871-3p	10.24276185	7.186316391	8.96059801	33.4218506	10.08736635
mmu-miR-871-5p	1.175398901	0.898289549	0.746716501	0.911505016	0
mmu-miR-872-3p	12.42564552	18.68442262	10.95184201	10.02655518	12.36515876
mmu-miR-872-5p	318.1972739	375.4850314	270.5602788	408.0504123	307.5019744
mmu-miR-873a-5p	0	0	0	0	0
mmu-miR-874-3p	3.694110832	7.725290121	2.737960503	8.811215158	1.626994573
mmu-miR-874-5p	0	0	0	1.823010033	1.952393488
mmu-miR-875-5p	0	0.718631639	0.497811001	0	0
mmu-miR-877-3p	0	0.718631639	0	1.519175027	3.253989147
mmu-miR-877-5p	19.3101248	28.20629184	25.63726653	37.97937568	23.75412077
mmu-miR-878-3p	0.671656515	1.257605368	0	0	0
mmu-miR-878-5p	8.395706436	8.982895489	4.231393505	6.076700109	9.111169611
mmu-miR-879-3p	0	0	0	0	0
mmu-miR-879-5p	1.007484772	0.17965791	0	0	0
mmu-miR-880-3p	2.854540188	1.796579098	2.489055003	0.303835005	3.253989147
mmu-miR-881-3p	148.9398322	163.6683558	119.7235456	178.0473132	134.0643528
mmu-miR-883a-3p	1.34331303	3.054184466	5.724826507	3.038350054	3.253989147
mmu-miR-883b-3p	0	0	0	0	0
mmu-miR-92a-1-5p	3.190368446	1.437263278	5.973732007	7.899710141	7.158776123
mmu-miR-92a-2-5p	0	0.898289549	0	0	0
mmu-miR-92a-3p	3585.974133	2784.517944	3489.157303	4010.622072	3551.729154
mmu-miR-92b-3p	23.17214976	23.17587036	17.67229052	12.76107023	13.99215333
mmu-miR-92b-5p	0.671656515	0	0	0.303835005	0.650797829
mmu-miR-93-3p	5.373252119	8.26426385	12.69418051	17.31859531	11.38896201
mmu-miR-935	2.014969545	2.335552827	0	0.303835005	0
mmu-miR-93-5p	2664.125566	3325.827226	4273.209629	3785.784168	4616.434402
mmu-miR-9-3p	1.34331303	1.616921188	0.497811001	0	1.301595659
mmu-miR-9-5p	118.715289	103.1236402	172.4915117	129.4337123	226.8030435
mmu-miR-96-5p	14.77644333	10.24050086	12.44527501	11.54573021	19.52393488
mmu-miR-9769-3p	0.671656515	0.35931582	1.742338502	0	0.650797829
mmu-miR-98-3p	7.052393406	9.521869218	5.227015506	15.19175027	1.952393488
mmu-miR-98-5p	234.5760378	398.6609018	358.1750149	353.3601113	373.557954
mmu-miR-99a-3p	1.847055416	2.874526556	3.484677004	3.646020065	4.88098372
mmu-miR-99a-5p	5501.034771	6745.076565	3924.244118	4882.020867	6034.522872
mmu-miR-99b-3p	38.6202496	37.36884523	21.40587302	32.81418059	39.37326867
mmu-miR-99b-5p	1581.751092	1521.522838	1309.989648	1403.41389	1312.984621
mmu-miR-9b-3p	118.0436325	103.1236402	172.4915117	129.4337123	226.8030435
novel_131	7.89196405	5.389737293	6.720448508	7.899710141	11.71436093
novel_159	1.511227158	1.616921188	1.244527501	3.646020065	0.325398915
novel_163	0.167914129	0.35931582	0	3.646020065	0.325398915
novel_165	0	0	0	0	0
novel_182	0	0.17965791	0	0	0
novel_185	0	0	0	0	0
novel_191	0	0.538973729	0	0	0
novel_197	0	0	0	0	0
novel_199	0	0	0	0	0
novel_203	0.167914129	0	0.995622001	0	0
novel_204	0	1.437263278	0	0	0
novel_208	1.34331303	0	0	0	0
novel_211	0	0	0.2489055	0	0
novel_215	1.007484772	0	0	0	0
novel_218	1.175398901	0	0	0.911505016	0
novel_224	0.503742386	0	0.497811001	0	0
novel_233	0	0	0	0	0
novel_235	0.335828257	0	0	0	1.301595659
novel_238	0	1.437263278	0	1.519175027	0
novel_258	0.671656515	1.796579098	1.742338502	2.430680044	1.952393488
novel_274	0	0	0	0	0.325398915
novel_279	1.511227158	0	0	0	0
novel_291	0	0	0	3.038350054	0
novel_303	0	1.437263278	0	0	0
novel_309	0	0	2.986866003	0	0
novel_323	0	0.17965791	0	0	3.253989147
novel_330	0	0	1.493433002	0	0
novel_332	0.167914129	0.718631639	4.231393505	4.253690076	0.650797829
novel_335	13.4331303	18.14544889	30.11756553	22.1799554	27.98430666
novel_341	0	1.257605368	0	0	0
novel_343	0.335828257	1.257605368	0	0	0.325398915
novel_349	0.335828257	0	0	0	0
novel_355	2.854540188	4.850763564	11.69855851	20.05311036	2.277792403
novel_359	0	0	0	0.303835005	0.976196744
novel_366	0	0	0	0	0
novel_374	0.503742386	0.538973729	0.2489055	0.911505016	1.626994573
novel_378	0	0	1.493433002	0	0
novel_379	0	0	0.995622001	0	1.626994573
novel_381	0	1.616921188	0.2489055	2.126845038	0
novel_382	0	0.17965791	0.2489055	0.607670011	0.976196744
novel_384	0.503742386	1.257605368	0.995622001	0	0.325398915
novel_385	0	0	0.497811001	0	0
novel_386	1.34331303	0	0	0	0
novel_388	0.503742386	0	0	0	0
novel_393	0	0	0	0	0
novel_397	0	1.437263278	0	0	0
novel_398	0.839570644	0.17965791	0.2489055	1.215340022	1.301595659
novel_399	0	0	0	3.34218506	0
novel_400	0	0	0	0	1.952393488
novel_403	3.022454317	4.132131925	8.96059801	12.15340022	2.277792403
novel_410	0	0	2.737960503	0	0
novel_418	0	0	0	2.734515049	0
novel_422	0.839570644	0.17965791	0	0	0.325398915
novel_424	1.175398901	0.898289549	0.995622001	4.557525082	2.603191317
novel_425	0	0	0	1.215340022	0
novel_429	0.503742386	1.976237008	0.2489055	3.038350054	5.206382635
novel_430	0.167914129	1.077947459	1.244527501	2.430680044	1.626994573
novel_433	0	0.17965791	0	2.734515049	0
novel_436	0	0	0	1.823010033	0.650797829
novel_438	0	0	0.497811001	0	0
novel_439	0	0	0	2.734515049	0
novel_440	0.335828257	0	0	0	0
novel_444	0	0	0	1.215340022	0.325398915
novel_445	0	0	0.2489055	0	0.650797829
novel_448	0.503742386	0	0	4.557525082	0
novel_454	0.503742386	0.35931582	0	1.519175027	0
novel_455	0	0	0	0	0
novel_456	0	0	1.991244002	0.911505016	0
novel_457	1.511227158	0	0	1.215340022	0
novel_464	0	0	0	3.038350054	0
novel_467	0	0	0.746716501	0	0
novel_468	0	0	0	0	0
novel_471	0	0	0	0	1.626994573
novel_472	0	0	0	2.734515049	0
novel_473	0	0	0	2.126845038	0
novel_474	0	0	0	0	3.253989147
novel_476	0.671656515	0	0	0	0
novel_481	0	0	0	2.126845038	0
novel_482	0	0	2.489055003	0	0
novel_483	0	0	0	3.038350054	0
novel_485	0.335828257	0.17965791	3.235771504	0	0
novel_486	0	0	0	0	0
novel_487	0	0.898289549	0.995622001	0	0
novel_490	0.503742386	0	0	1.823010033	0
novel_491	0	0	0	0	0
novel_495	0.503742386	0.35931582	0	0	0.976196744
novel_499	0	0.898289549	0	0.911505016	0
novel_500	0.167914129	1.257605368	0	0	0
novel_501	0	0	1.244527501	0	0.325398915
novel_502	0	0	0	0.303835005	0
novel_504	0	0	0	0	0
novel_505	0	0	0	2.430680044	0
novel_507	0	0	0	2.430680044	0
novel_508	1.511227158	0	0	0	0
novel_509	0	0	0	0	0
novel_510	0	0	0	0	0
novel_513	0	0	0	1.823010033	0
novel_515	0.503742386	0	0.746716501	0	0.325398915
novel_516	0	0	1.244527501	0	0
novel_517	0	0	0	1.823010033	0.650797829
novel_521	0	0	0	2.734515049	0
novel_524	0	0	0	0	0
novel_525	0	0	0	0	0
novel_526	0	2.155894917	0	0	0
novel_527	0	1.796579098	1.742338502	0	0
novel_528	0	0	0	2.126845038	0
novel_529	0	0	0	0	0
novel_530	0	0.898289549	0	0.607670011	0.976196744
novel_532	0	0	0	2.430680044	0
novel_533	0.839570644	0	0	1.519175027	0
novel_535	1.511227158	0	0	0	0
novel_536	0	0	0.2489055	0	0
novel_538	0	0	0	0	0
novel_539	0	0	0	1.215340022	0
novel_540	0.167914129	0.17965791	1.493433002	1.823010033	0
novel_543	0	0	0	0	0
novel_545	0	1.616921188	1.742338502	0	0
novel_547	0.839570644	0	0	0	0
novel_548	0	0	0	0	2.277792403
novel_550	0	0	0	0.911505016	0
novel_557	0	0	0	0	0
novel_558	0	1.257605368	0	0	0
novel_560	0	0	0	2.734515049	0
