# Supplementary material for: Psychological stress disturbs bone metabolism via miR-335-3p/Fos signaling in osteoclast
Source: eLife. 2025 Jan 8;13:RP95944. doi: 10.7554/eLife.95944 (PMC11709429; doi:10.7554/eLife.95944)
Supplement: Figure 4—source data 2. [file elife-95944-fig4-data2.xlsx]

## Sheet: Fig4.E
ID	GENE AVE	U6 AVE	gene
CUMS2	24.93	11.8233	1298-5p
CUMS3	25.58	12.0567	1298-5p
CUMS6	25.5067	11.9967	1298-5p
CUMS5	28.6767	12.1567	1298-5p
CUMS4	28.74	13.7533	1298-5p
CON10	25.19	11.7567	1298-5p
CON 9	28.1767	12.3833	1298-5p
CON13	27.13	12.7367	1298-5p
CUMS2	32.4433	11.8233	335-3p
CUMS3	32.4667	12.0567	335-3p
CUMS6	32.7667	11.9967	335-3p
CUMS5	34.91	12.1567	335-3p
CUMS4	34.6533	13.7533	335-3p
CON10	30.6567	11.7567	335-3p
CON 9	32.05	12.3833	335-3p
CON13	31.82	12.7367	335-3p
CUMS2	25.5467	11.8233	133a-3p
CON10	19.19	11.7567	133a-3p
CUMS3	23.2033	12.0567	133a-3p
CUMS6	24.1433	11.9967	133a-3p
CUMS5	25.8633	12.1567	133a-3p
CUMS4	25.8833	13.7533	133a-3p
CON 9	20.6533	12.3833	133a-3p
CON13	20.42	12.7367	133a-3p
CUMS2	23.96	11.8233	144-5p
CON10	25.7733	11.7567	144-5p
CUMS3	24.7833	12.0567	144-5p
CUMS6	24.7233	11.9967	144-5p
CUMS5	26.2867	12.1567	144-5p
CUMS4	26.7833	13.7533	144-5p
CON 9	27.8133	12.3833	144-5p
CON13	26.2967	12.7367	144-5p
CUMS2	25.9333	11.8233	582-3p
CON10	26.38	11.7567	582-3p
CUMS3	27.21	12.0567	582-3p
CUMS6	27.1533	11.9967	582-3p
CUMS5	33.4367	12.1567	582-3p
CUMS4	34.6533	13.7533	582-3p
CON 9	33.1333	12.3833	582-3p
CON13	32.68	12.7367	582-3p
CUMS2	37.9	12.1567	1b-5p
CON10	37.95	12.37	1b-5p
CUMS3	37.85	12.11	1b-5p
CUMS6	40	13.78	1b-5p
CUMS5	40	13.7	1b-5p
CUMS4	38.54	12.3833	1b-5p
CON 9	38.1175	12.71	1b-5p
CON13	38.26	12.91	1b-5p

## Sheet: Fig4.F
MODEL	Sample	cq ave	U6 ave	GENE
CON1	m-PFC	25.8914	18.5029	mmu-miR-335-3p
CON2	m-PFC	24.4086	17.0196	mmu-miR-335-3p
CON3	m-PFC	24.8033	16.7737	mmu-miR-335-3p
CON4	m-PFC	24.6238	16.9629	mmu-miR-335-3p
CUMS1	m-PFC	23.9635	16.7933	mmu-miR-335-3p
CUMS2	m-PFC	24.9779	16.6843	mmu-miR-335-3p
CUMS3	m-PFC	25.4948	17.1259	mmu-miR-335-3p
CUMS4	m-PFC	24.7531	16.4928	mmu-miR-335-3p
CON1	amgdala	25.6502	18.2037	mmu-miR-335-3p
CON2	amgdala	23.3069	16.9557	mmu-miR-335-3p
CON3	amgdala	24.3206	16.2017	mmu-miR-335-3p
CON4	amgdala	24.5001	16.8665	mmu-miR-335-3p
CUMS1	amgdala	23.366	16.6849	mmu-miR-335-3p
CUMS2	amgdala	24.4489	16.7006	mmu-miR-335-3p
CUMS3	amgdala	25.4375	17.9671	mmu-miR-335-3p
CUMS4	amgdala	24.214	16.7707	mmu-miR-335-3p
CON1	hypothalamus	25.0994	17.7397	mmu-miR-335-3p
CON2	hypothalamus	22.9735	16.5395	mmu-miR-335-3p
CON3	hypothalamus	24.0878	16.7521	mmu-miR-335-3p
CON4	hypothalamus	24.2393	17.1657	mmu-miR-335-3p
CUMS1	hypothalamus	24.1029	16.6975	mmu-miR-335-3p
CUMS2	hypothalamus	24.8707	17.7365	mmu-miR-335-3p
CUMS3	hypothalamus	23.9351	16.6992	mmu-miR-335-3p
CUMS4	hypothalamus	24.0161	17.3714	mmu-miR-335-3p
CON1	hippocampus	27.9668	18.3052	mmu-miR-335-3p
CON2	hippocampus	26.2237	16.9865	mmu-miR-335-3p
CON3	hippocampus	27.2188	18.2424	mmu-miR-335-3p
CON4	hippocampus	26.406	17.9694	mmu-miR-335-3p
CUMS1	hippocampus	27.4335	17.5202	mmu-miR-335-3p
CUMS2	hippocampus	26.5137	17.73	mmu-miR-335-3p
CUMS3	hippocampus	26.7416	17.1867	mmu-miR-335-3p
CUMS4	hippocampus	26.3551	17.8968	mmu-miR-335-3p
CON1	NAC	22.1394	16.1245	mmu-miR-335-3p
CON2	NAC	23.2164	17.8026	mmu-miR-335-3p
CON3	NAC	23.9593	17.1451	mmu-miR-335-3p
CON4	NAC	23.2925	17.9058	mmu-miR-335-3p
CUMS1	NAC	23.7641	16.3988	mmu-miR-335-3p
CUMS2	NAC	26.6458	19.7008	mmu-miR-335-3p
CUMS3	NAC	23.2478	16.5767	mmu-miR-335-3p
CUMS4	NAC	23.7189	16.9669	mmu-miR-335-3p

## Sheet: Fig4.G
Model	sample	cq ave	cel-miR-39-3p	gene
CON1	serum	36.92	18.69	335-3p
CON2	serum	38.5467	19.97	335-3p
CON3	serum	40	20.73	335-3p
CUMS1	serum	39.24	19.3933	335-3p
CUMS2	serum	40	19.13	335-3p
CUMS3	serum	40	20.4633	335-3p
