# Supplementary material for: Psychological stress disturbs bone metabolism via miR-335-3p/Fos signaling in osteoclast
Source: eLife. 2025 Jan 8;13:RP95944. doi: 10.7554/eLife.95944 (PMC11709429; doi:10.7554/eLife.95944)
Supplement: Figure 5—figure supplement 1—source data 1. [file elife-95944-fig5-figsupp1-data1.xlsx]

## Sheet: Fig5S-1
Cell	Sample	Cq ave	U6 ave	GENE
Raw264.7	INC-1	37.4396	18.2343	miR-335-3p
Raw264.7	INC-2	37.5932	17.9862	miR-335-3p
Raw264.7	INC-3	37.5184	18.1683	miR-335-3p
Raw264.7	INC-4	37.9372	17.964	miR-335-3p
Raw264.7	INC-5	37.2816	17.5832	miR-335-3p
Raw264.7	INC-6	37.027	17.581	miR-335-3p
Raw264.7	Inhibitor-1	37.6309	17.9268	miR-335-3p
Raw264.7	Inhibitor-2	37.8536	17.7193	miR-335-3p
Raw264.7	Inhibitor-3	38.0733	17.5507	miR-335-3p
Raw264.7	Inhibitor-4	39.2909	18.167	miR-335-3p
Raw264.7	Inhibitor-5	37.6512	17.7844	miR-335-3p
Raw264.7	Inhibitor-6	37.5471	17.7022	miR-335-3p

## Sheet: Fig5S-2
Cell	Sample	Cq ave	U6 AVE	GENE
Raw264.7	MNC1	33.2347	18.7223	miR-335-3p
Raw264.7	MNC2	33.2262	18.7516	miR-335-3p
Raw264.7	MNC3	33.2053	19.1226	miR-335-3p
Raw264.7	Mimic-1	21.1045	18.0507	miR-335-3p
Raw264.7	Mimic-2	20.9861	18.0537	miR-335-3p
Raw264.7	Mimic-3	21.1761	18.2624	miR-335-3p
