# Supplementary material for: Psychological stress disturbs bone metabolism via miR-335-3p/Fos signaling in osteoclast
Source: eLife. 2025 Jan 8;13:RP95944. doi: 10.7554/eLife.95944 (PMC11709429; doi:10.7554/eLife.95944)
Supplement: Figure 5—source data 1. [file elife-95944-fig5-data1.xlsx]

## Sheet: Fig.5B
Mimic NC	Mimic	Inhibitor NC	Inhibitor	Total area
7113302	6504873	8381870	9780065	19991040
7086964	6344951	8216241	9839792	19991040
7046650	6551154	8546689	10846147	19991040
7022634	6619803	8605233	9947697	19991040

## Sheet: Fig.5C
Inhibitor NC	Inhibitor	Mimic NC	Mimic
19	38	28	13
17	27	30	18
21	35	22	11
28	34	44	13

## Sheet: Fig.5E
mimic NC	mimic	Inhibitor NC	Inhibitor
7.55847	2.89993	7.56767	19.2216
7.92937	0.945222	9.52726	31.8763
9.00915	1.32072	7.95611	17.4092
7.3562	2.37908	8.2984	19.7591
4.76262	4.23416	12.1852	14.1148
7.58032	1.54901	9.49376	12.4255

## Sheet: Fig.5F
Cell	Sample	Cq	Gapdh ave	Target
raw264.7	mimic1	24.5983	19.6353	Nfatc1
raw264.7	mimic2	25.1684	20.0514	Nfatc1
raw264.7	mimic3	24.6208	19.8512	Nfatc1
raw264.7	mmicNC1	24.5082	20.235	Nfatc1
raw264.7	mmicNC2	24.7475	20.2251	Nfatc1
raw264.7	mmicNC3	24.5048	20.1244	Nfatc1
raw264.7	Inhibitor1	25.0683	20.2196	Nfatc1
raw264.7	Inhibitor2	25.0723	20.1111	Nfatc1
raw264.7	Inhibitor3	24.7595	20.1876	Nfatc1
raw264.7	inhibitor NC1	25.8226	20.7309	Nfatc1
raw264.7	inhibitor NC2	25.5441	20.2689	Nfatc1
raw264.7	inhibitor NC3	25.7676	20.366	Nfatc1
raw264.7	mimic1	21.2869	19.4346	ACP5
raw264.7	mimic2	21.0578	19.4624	ACP5
raw264.7	mimic3	21.0535	19.6434	ACP5
raw264.7	mmicNC1	22.8323	20.3892	ACP5
raw264.7	mmicNC2	22.43	20.4443	ACP5
raw264.7	mmicNC3	23.1763	20.2541	ACP5
raw264.7	Inhibitor1	21.3023	19.4421	ACP5
raw264.7	Inhibitor2	21.2119	19.5599	ACP5
raw264.7	Inhibitor3	21.1526	19.4028	ACP5
raw264.7	inhibitor NC1	20.8144	19.6104	ACP5
raw264.7	inhibitor NC2	20.8501	19.7227	ACP5
raw264.7	inhibitor NC3	20.789	19.6088	ACP5
raw264.7	mimic1	25.3021	19.4624	MMP-9
raw264.7	mimic2	25.2356	19.4346	MMP-9
raw264.7	mimic3	25.3202	19.6434	MMP-9
raw264.7	mmicNC1	26.6024	20.3892	MMP-9
raw264.7	mmicNC2	26.3326	20.2541	MMP-9
raw264.7	mmicNC3	26.97	20.4443	MMP-9
raw264.7	Inhibitor1	26.3419	19.4421	MMP-9
raw264.7	Inhibitor2	26.2397	19.4028	MMP-9
raw264.7	Inhibitor3	26.6415	19.5599	MMP-9
raw264.7	inhibitor NC1	25.9159	19.6104	MMP-9
raw264.7	inhibitor NC2	26.1044	19.7227	MMP-9
raw264.7	inhibitor NC3	26.295	19.6088	MMP-9

## Sheet: Fig.5I
	BV/TV	BS/TV	Tb.N	Tb.Pf	Conn.Dn	SMI
Agomir NC1	13.1776	8.44804	2.10705	25.5447	0.000217	2.39074
Agomir NC2	15.9852	9.28303	2.50191	19.2257	0.000345	1.98637
Agomir NC3	16.4024	9.49942	2.41434	21.1998	0.0003	2.19632
Agomir1	15.2777	8.6341	2.28574	19.1194	0.000263	2.02986
Agomir2	11.4451	7.73573	1.95537	26.1484	0.000223	2.32121
Agomir3	15.2656	9.06766	2.41229	20.1909	0.000345	2.03951
Natagomir NC1	23.7046	11.189	2.96387	15.6162	0.000395	1.98503
Natagomir NC2	20.3992	10.1973	2.64462	17.4547	0.000326	2.09505
Natagomir NC3	23.2038	10.8727	2.87331	15.9357	0.000357	2.04054
Natagomir 1	16.9846	8.99408	2.19096	21.8104	0.000217	2.47123
Natagomir 2	16.9846	8.99408	2.19096	21.8104	0.000217	2.47123
Natagomir 3	13.8922	7.26684	1.69286	23.8817	0.000167	2.73931
