# Supplementary material for: Psychological stress disturbs bone metabolism via miR-335-3p/Fos signaling in osteoclast
Source: eLife. 2025 Jan 8;13:RP95944. doi: 10.7554/eLife.95944 (PMC11709429; doi:10.7554/eLife.95944)
Supplement: Figure 6—figure supplement 1—source data 1. [file elife-95944-fig6-figsupp1-data1.xlsx]

## Sheet: Sheet1
sample	ID	cq ave	GAPDH-Cq	Gene
femur	CUMS-1	29.7527	23.3617	Fos
femur	CUMS-2	31.3215	24.2763	Fos
femur	CUMS-3	30.635	24.0998	Fos
femur	CON-1	29.1571	23.1711	Fos
femur	CON-2	29.2144	23.0615	Fos
femur	CON-3	35.3723	27.7302	Fos
