# Supplementary material for: Psychological stress disturbs bone metabolism via miR-335-3p/Fos signaling in osteoclast
Source: eLife. 2025 Jan 8;13:RP95944. doi: 10.7554/eLife.95944 (PMC11709429; doi:10.7554/eLife.95944)
Supplement: Figure 6—source data 1. [file elife-95944-fig6-data1.xlsx]

## Sheet: Fig.6D
Luc	mmu-Fos-WT+NC	mmu-Fos-WT+mmu-miR-335-3p	mmu-Fos-MUT(1+2)+NC	mmu-Fos-MUT(1+2)+mmu-miR-335-3p
1	2593695	144032	3789970	365593
2	2583811	152344	3607386	267482
3	2324905	135806	3333092	255698
Rluc	mmu-Fos-WT+NC	mmu-Fos-WT+mmu-miR-335-3p	mmu-Fos-MUT(1+2)+NC	mmu-Fos-MUT(1+2)+mmu-miR-335-3p
1	302349	30022	310217	43337
2	307658	30204	283687	32087
3	271378	31171	257773	30747

## Sheet: Fig.6H
Inhibitor NC	Inhibitor	Inhibitor+T5224
61	61	46
60	64	38
43	72	41
56	59	25
57	65	40
48	82	29

## Sheet: Fig.6G
Inhibitor NC	Inhibitor	Inhibitor+T5224		Total area
9466069	13657268	11668331		19991040
10653321	14742873	10173352
9672073	17013215	8982246
10072063	15361972	9957756

## Sheet: Fig.6I
cell	Sample	Cq	Gapdh ave	Target
Raw264.7	inhibitorNC3	22.7188	19.8376	Nfatc1
Raw264.7	inhibitorNC2	22.6402	19.6661	Nfatc1
Raw264.7	inhibitorNC1	22.7214	19.6866	Nfatc1
Raw264.7	Inhibitor3	22.986	20.4246	Nfatc1
Raw264.7	Inhibitor2	22.9135	20.1222	Nfatc1
Raw264.7	Inhibitor1	23.0892	20.4533	Nfatc1
Raw264.7	Inhibitor+T5224-3	22.7714	19.5102	Nfatc1
Raw264.7	Inhibitor+T5224-2	22.7807	19.8013	Nfatc1
Raw264.7	Inhibitor+T5224-1	22.6527	19.3386	Nfatc1
Raw264.7	inhibitorNC3	25.9018	20.4533	MMP-9
Raw264.7	inhibitorNC2	25.7898	20.3709	MMP-9
Raw264.7	inhibitorNC1	26.001	20.5343	MMP-9
Raw264.7	Inhibitor3	25.3393	20.4246	MMP-9
Raw264.7	Inhibitor2	25.2555	20.1222	MMP-9
Raw264.7	Inhibitor1	25.2525	20.1068	MMP-9
Raw264.7	Inhibitor+T5224-3	25.3444	19.8376	MMP-9
Raw264.7	Inhibitor+T5224-2	25.2368	19.6661	MMP-9
Raw264.7	Inhibitor+T5224-1	25.3074	19.6866	MMP-9
Raw264.7	inhibitorNC3	19.4731	19.5102	ACP5
Raw264.7	inhibitorNC2	19.4115	19.5102	ACP5
Raw264.7	inhibitorNC1	19.4824	19.5102	ACP5
Raw264.7	Inhibitor3	19.727	20.4246	ACP5
Raw264.7	Inhibitor2	19.6228	20.1222	ACP5
Raw264.7	Inhibitor1	19.6407	20.1068	ACP5
Raw264.7	Inhibitor+T5224-3	19.3157	19.5102	ACP5
Raw264.7	Inhibitor+T5224-2	19.2866	19.3386	ACP5
Raw264.7	Inhibitor+T5224-1	19.4519	19.8013	ACP5
